# Supplementary material for: Quantitative activity–activity relationship (QAAR) driven design to develop hydroxamate derivatives of pentanoic acids as selective HDAC8 inhibitors: synthesis, biological evaluation and binding mode of interaction studies
Source: Royal Society of Chemistry journal article supplement (doi:10.1039/d1nj02636d), 2021-01-01
Supplement: d1nj02636d1.pdf [file d1nj02636d1.pdf]

## Supplementary File

### **Quantitative activity-activity relationship (QAAR) driven design to develop hydroxamate derivatives of pentanoic acids as selective HDAC8 inhibitors: Synthesis, biological evaluation and binding mode of interaction studies**

Sk. Abdul Amin<sup>a</sup>, Prakruti Trivedi<sup>b</sup>, Nilanjan Adhikari<sup>a</sup>, Routholla Ganesh<sup>b</sup>, Dhanya Vijayasarithi<sup>b</sup>, Sanjib Das<sup>a</sup>, Balaram Ghosh<sup>b, \*</sup>, Tarun Jha<sup>a, \*</sup>

<sup>a</sup>*Natural Science Laboratory, Division of Medicinal and Pharmaceutical Chemistry, Department of Pharmaceutical Technology, Jadavpur University, Kolkata 700032, India.*

<sup>b</sup>*Epigenetic Research Laboratory, Department of Pharmacy, BITS-Pilani, Hyderabad Campus, Shamirpet, Hyderabad 500078, India.*

\*Corresponding author: [balaram@hyderabad.bits-pilani.ac.in](mailto:balaram@hyderabad.bits-pilani.ac.in); [tjupharm@yahoo.com](mailto:tjupharm@yahoo.com).

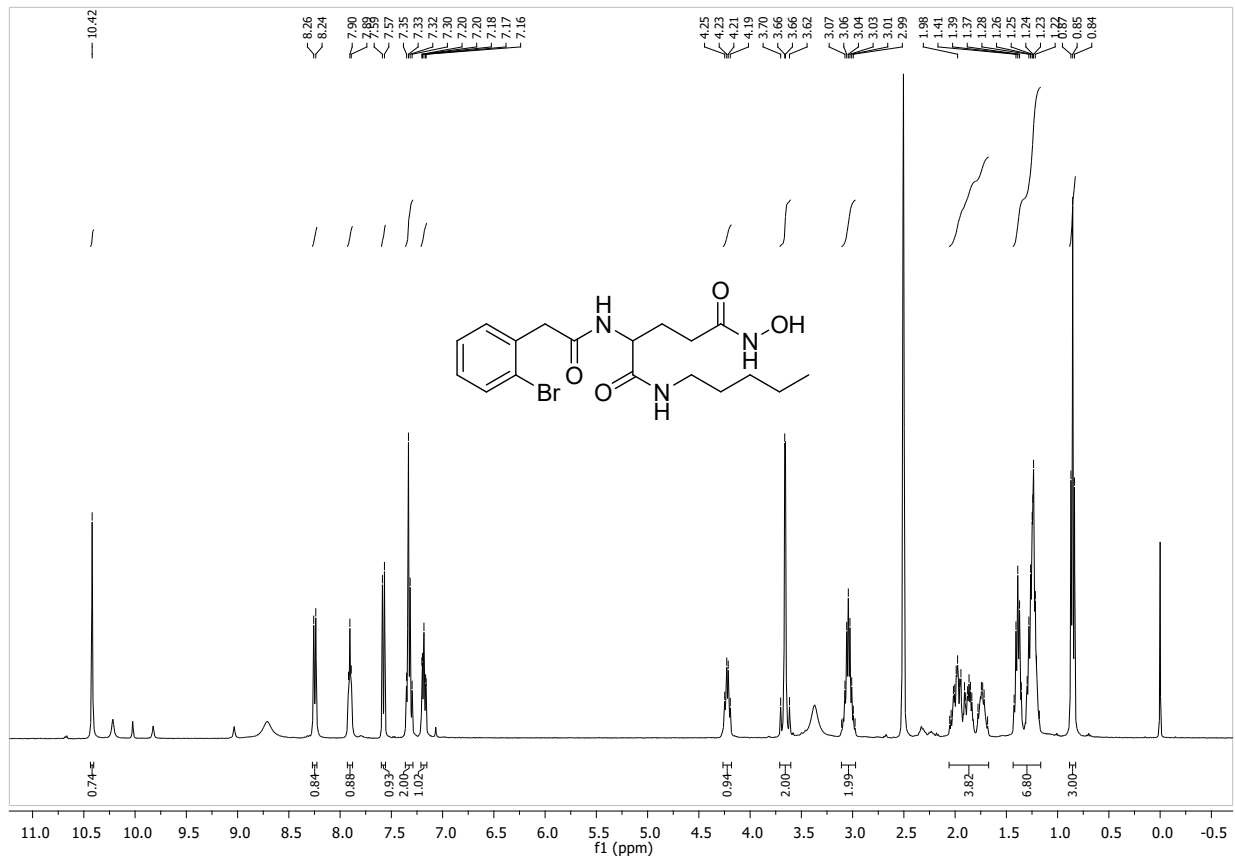

Supplementary Figure S1. <sup>1</sup>H NMR of 7a

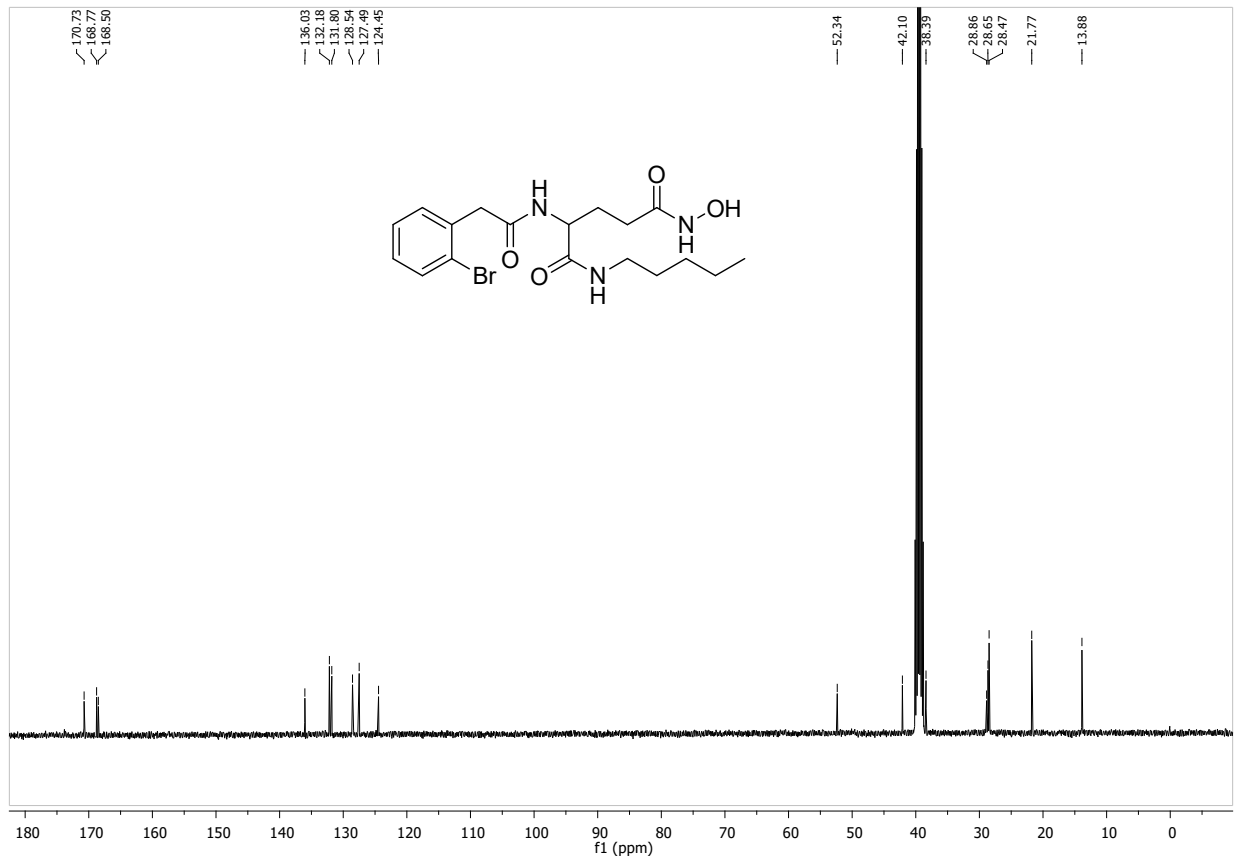

Supplementary Figure S2. <sup>13</sup>C NMR of 7a

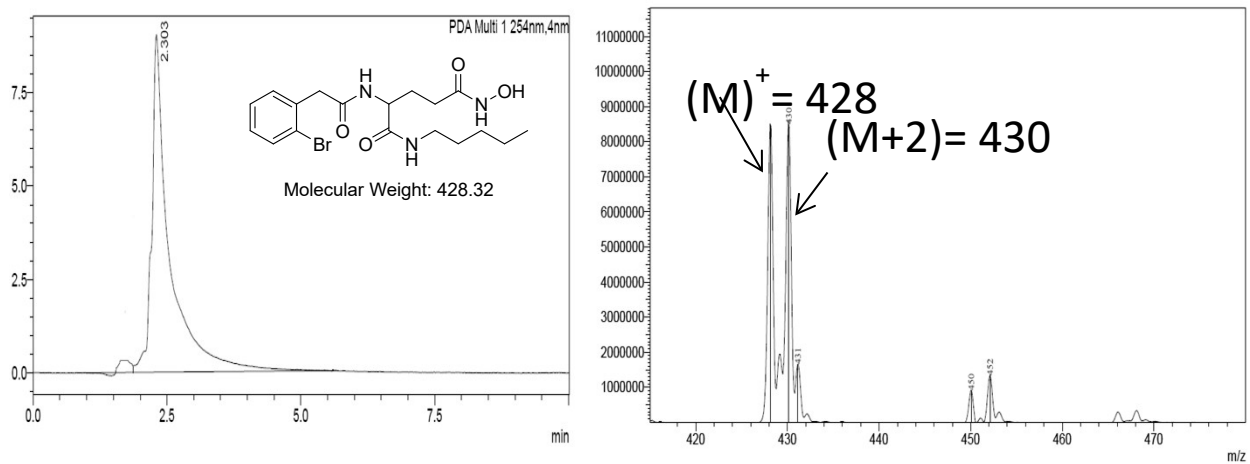

Supplementary Figure S3. LC/MS of 7a

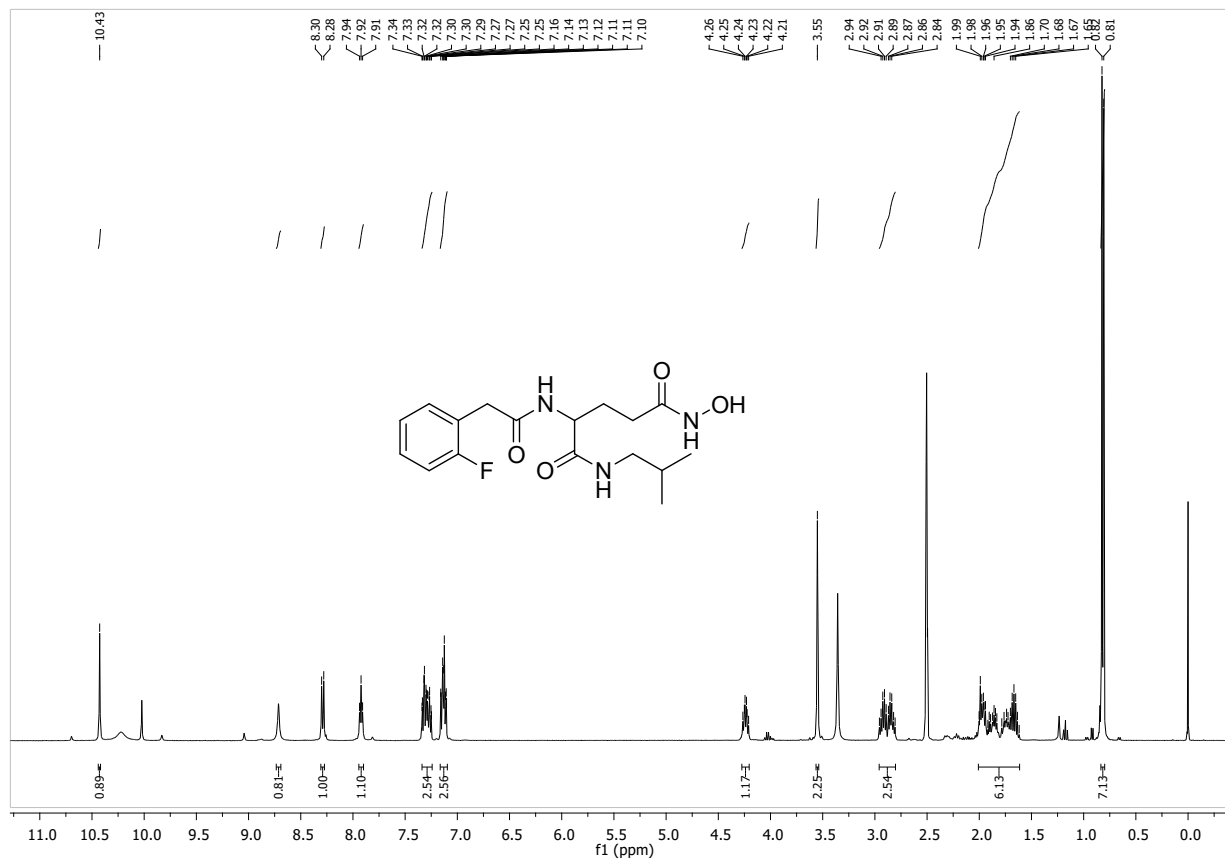

Supplementary Figure S4. <sup>1</sup>H NMR of 7b

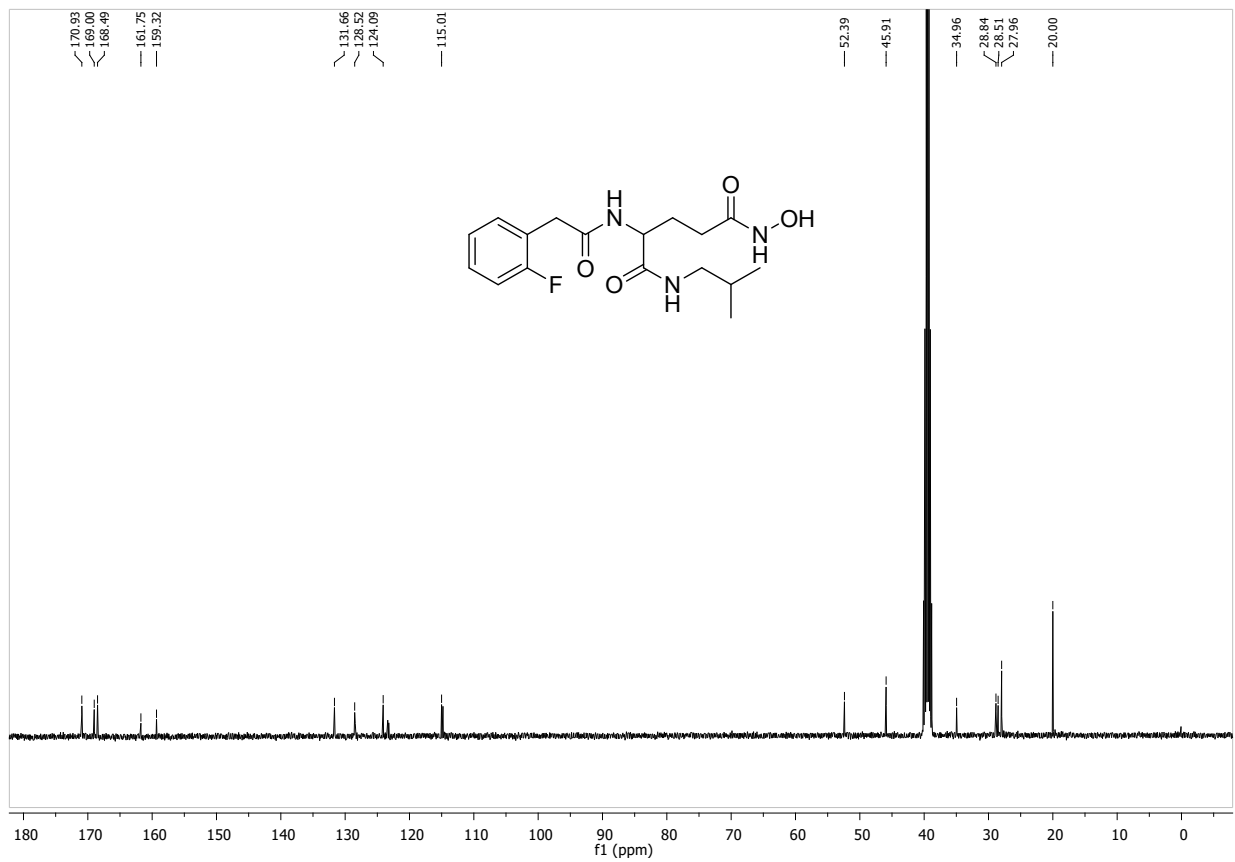

Supplementary Figure S5.  $^{13}\text{C}$  NMR of 7b

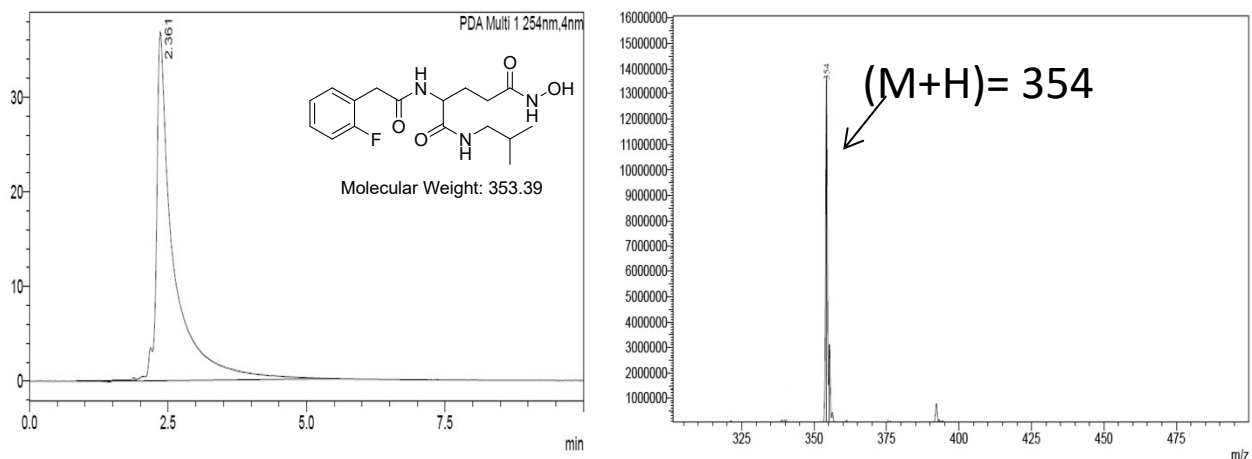

Supplementary Figure S6. LC/MS of 7b

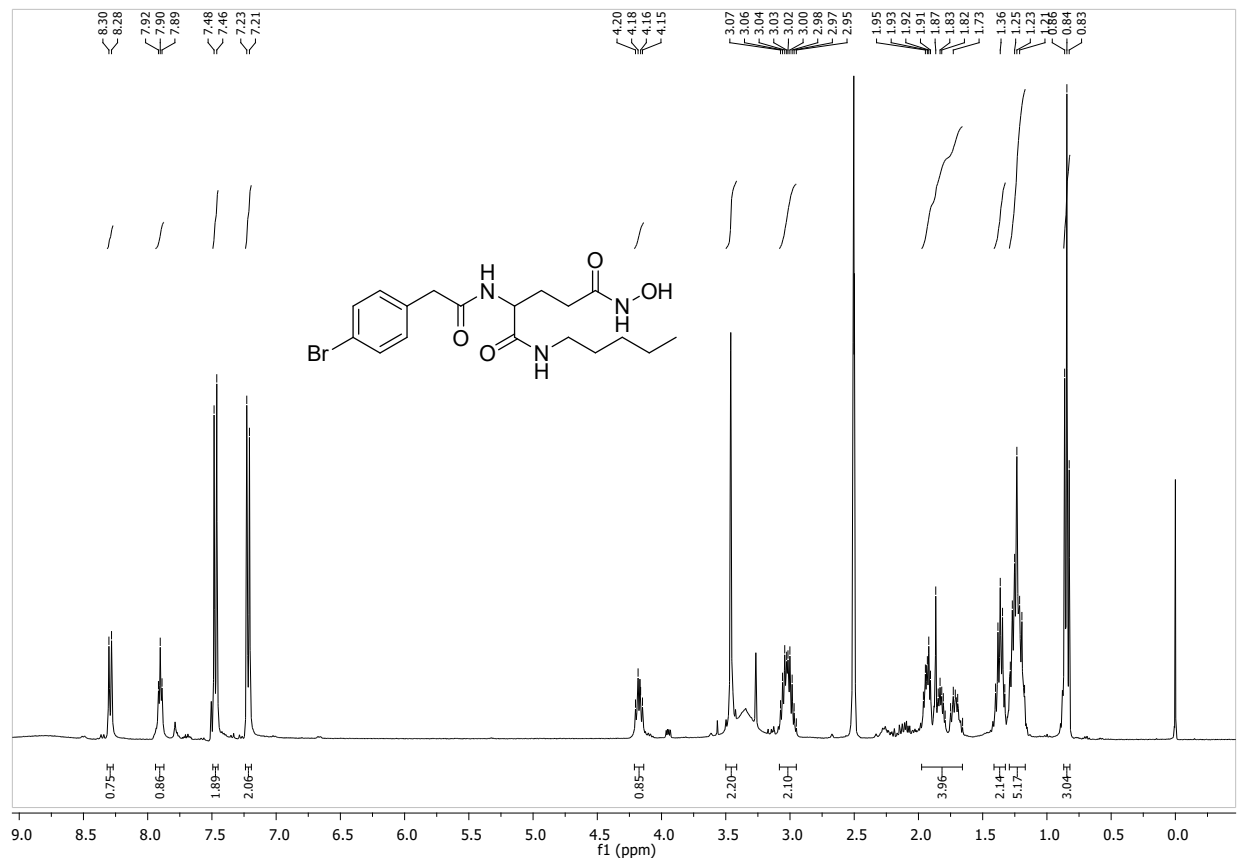

Supplementary Figure S7. <sup>1</sup>H NMR of 7c

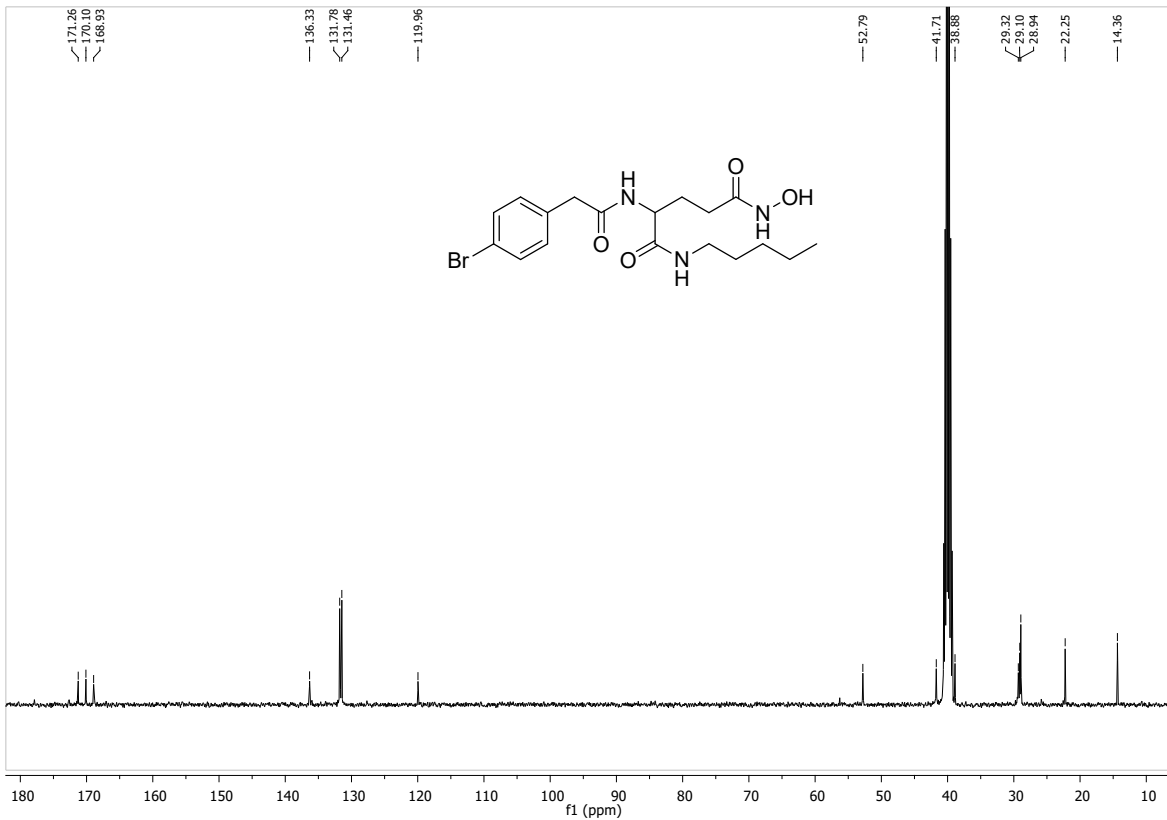

Supplementary Figure S8. <sup>13</sup>C NMR 7c

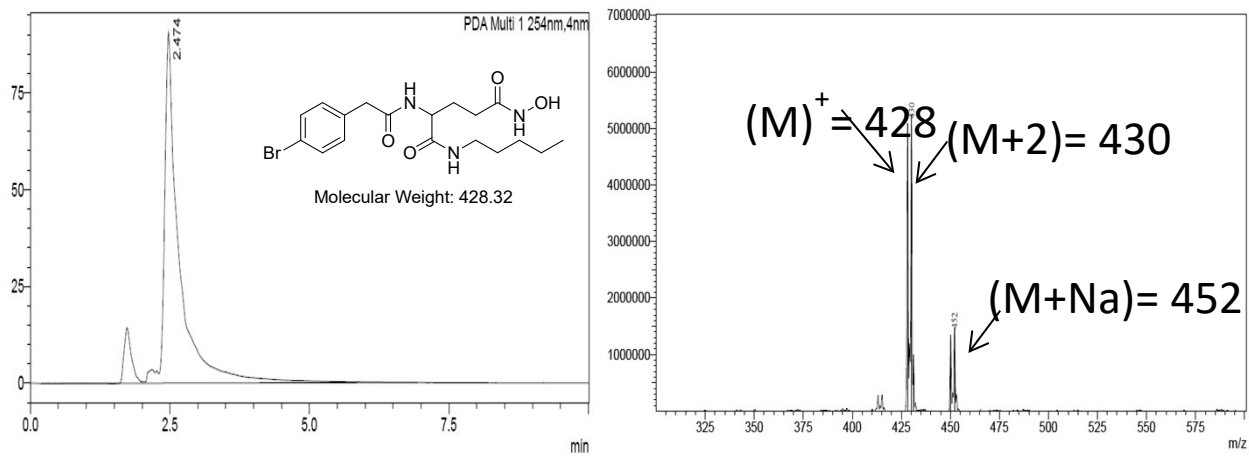

Supplementary Figure S9. LC/MS of 7c

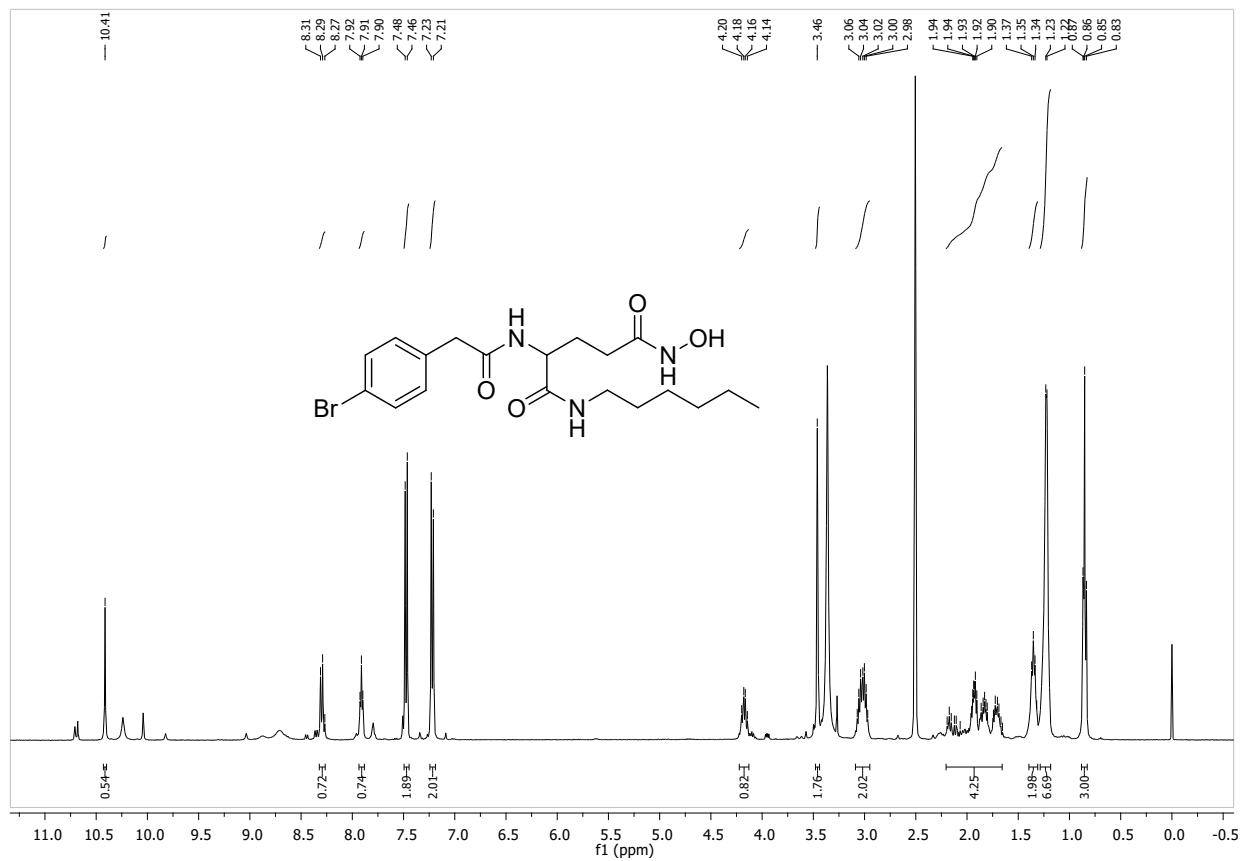

Supplementary Figure S10. <sup>1</sup>H NMR of 7d



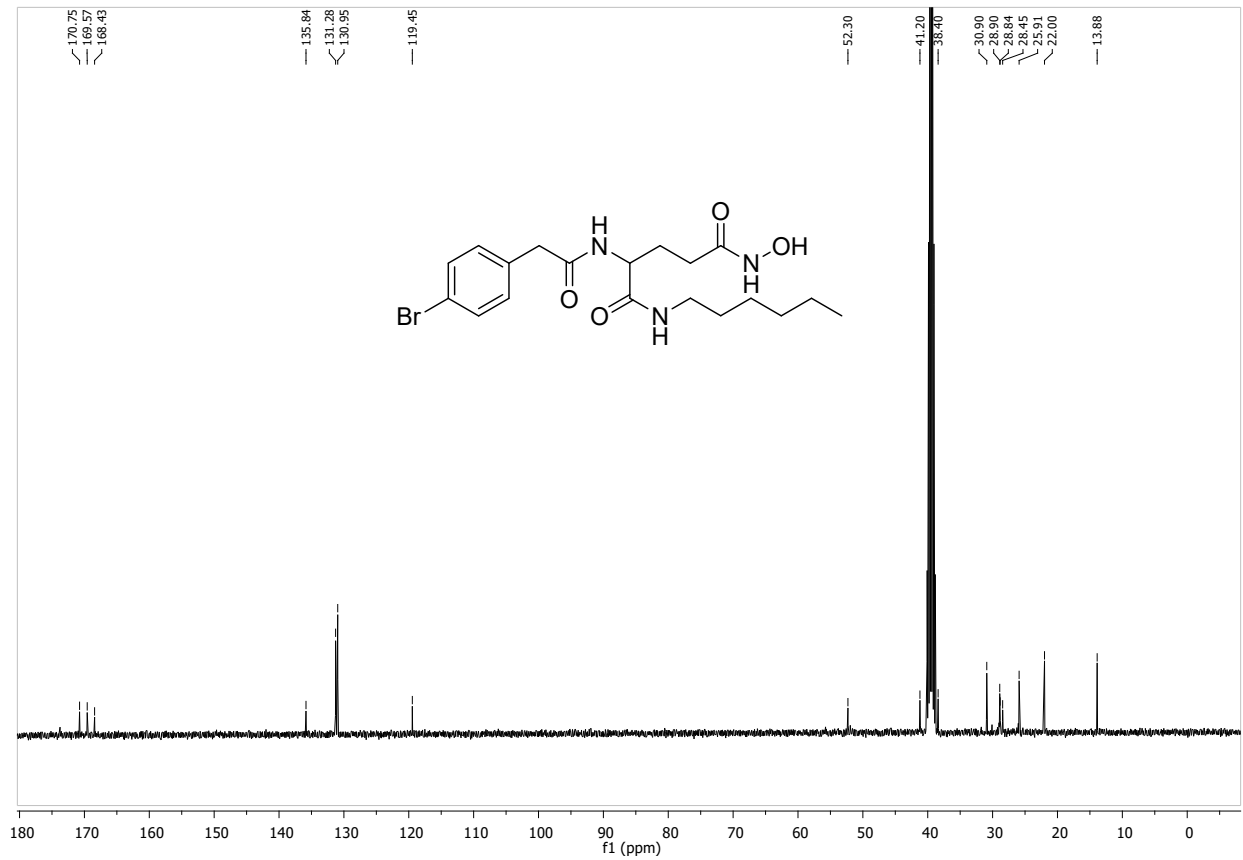

Supplementary Figure S11. <sup>13</sup>C NMR of 7d

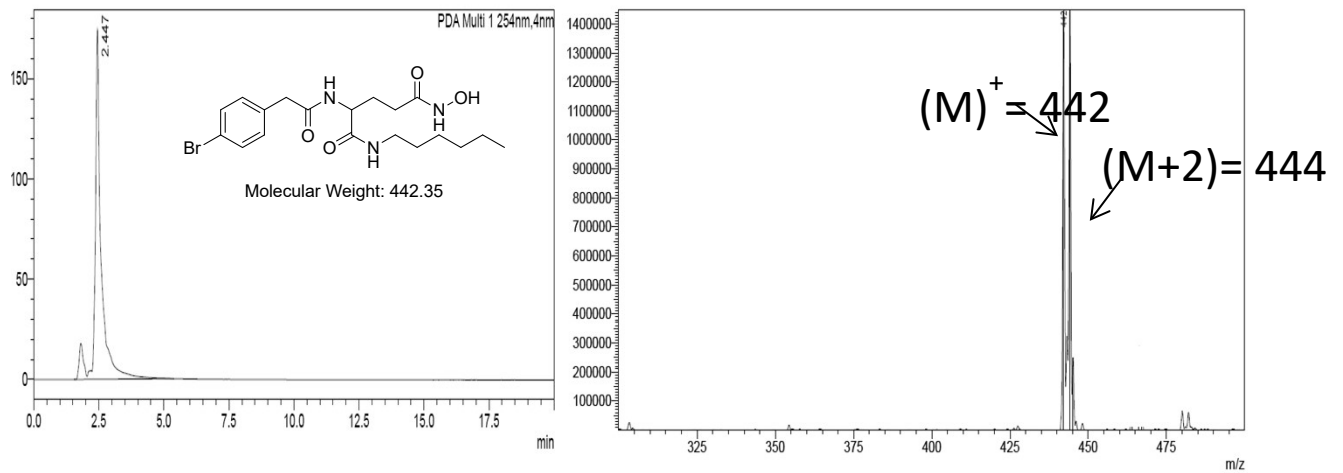

Supplementary Figure S12. LC/MS of 7d

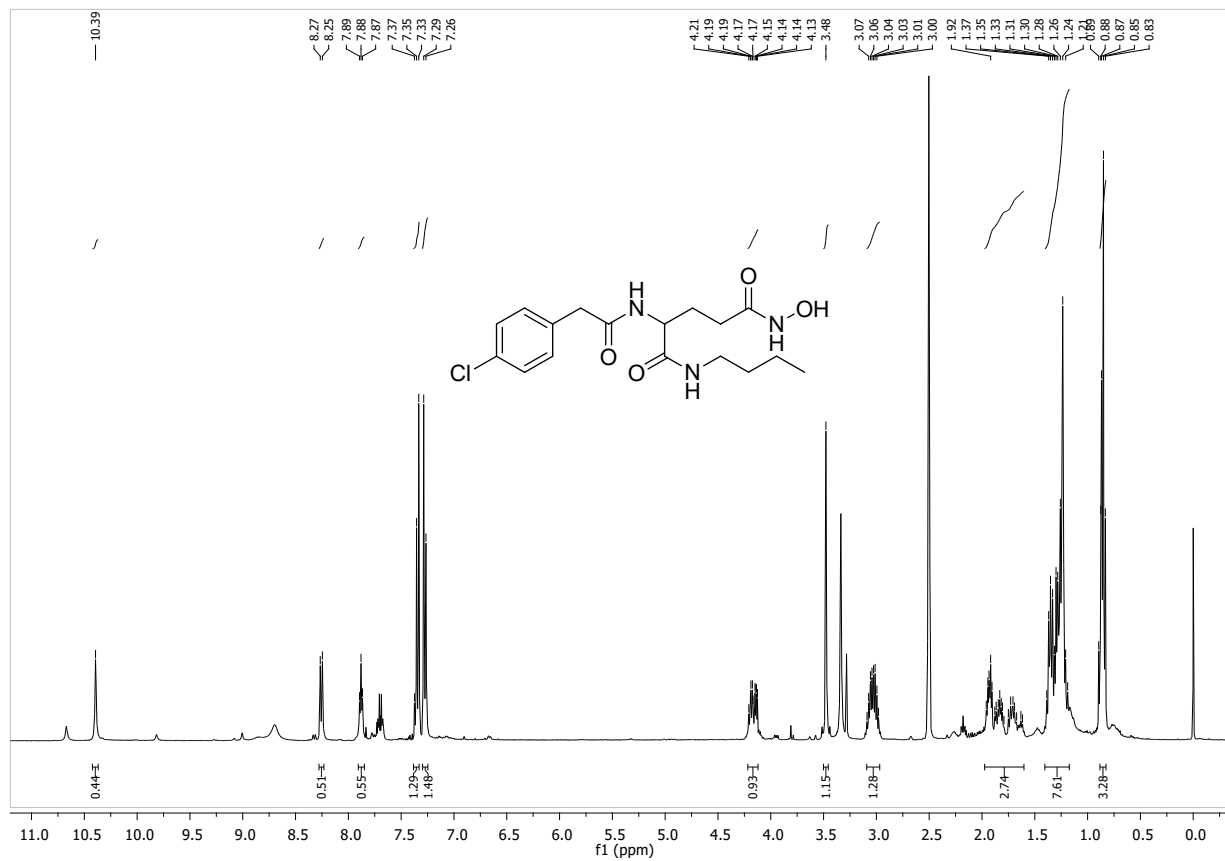

Supplementary Figure S13. <sup>1</sup>H NMR of 7e

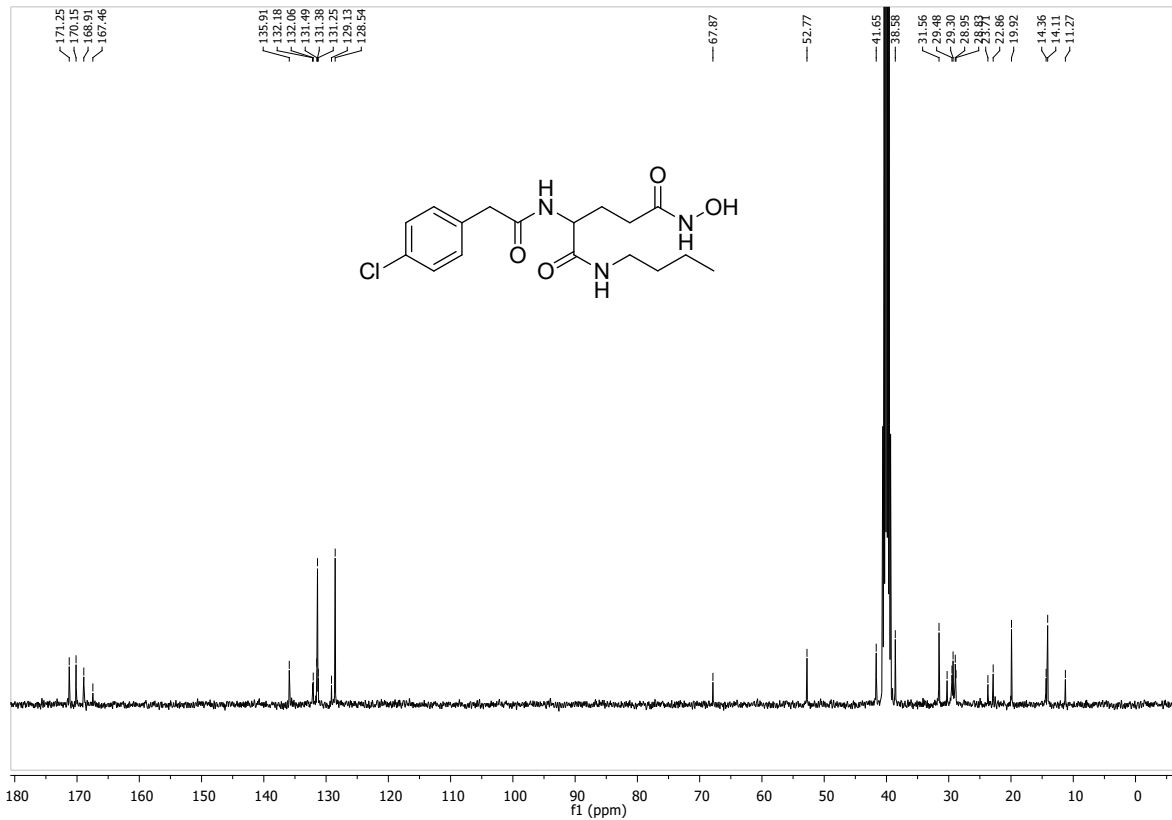

Supplementary Figure S14. <sup>13</sup>C NMR of 7e

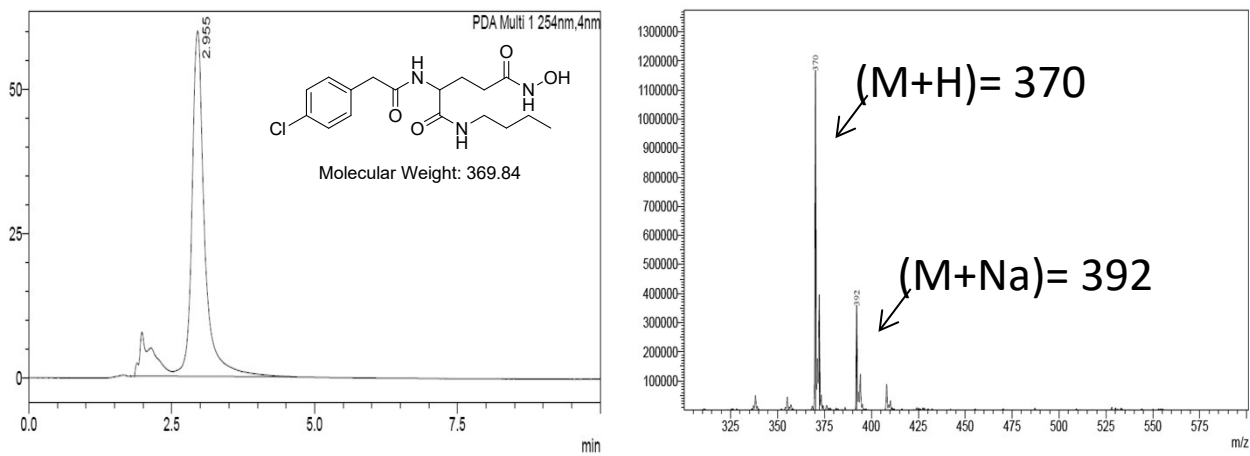

Supplementary Figure S15. LC/MS of 7e

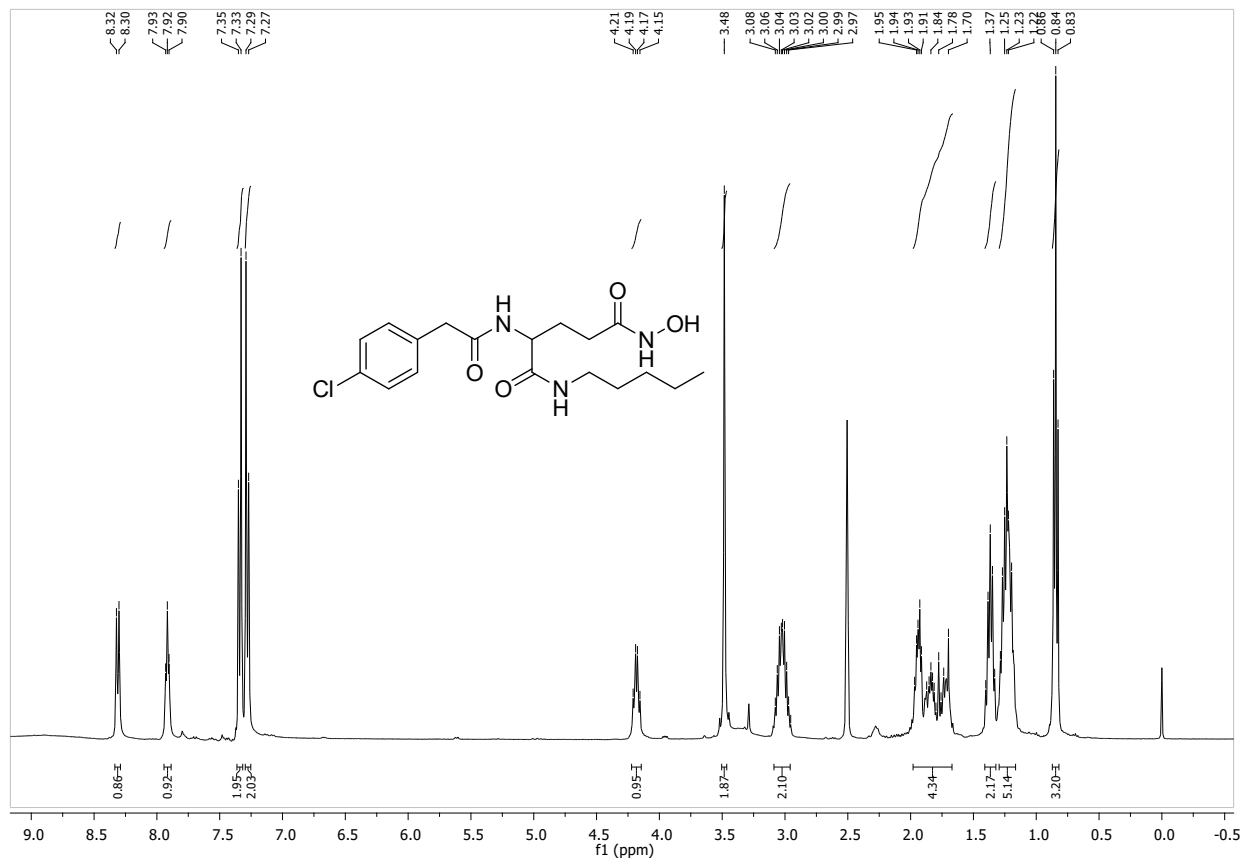

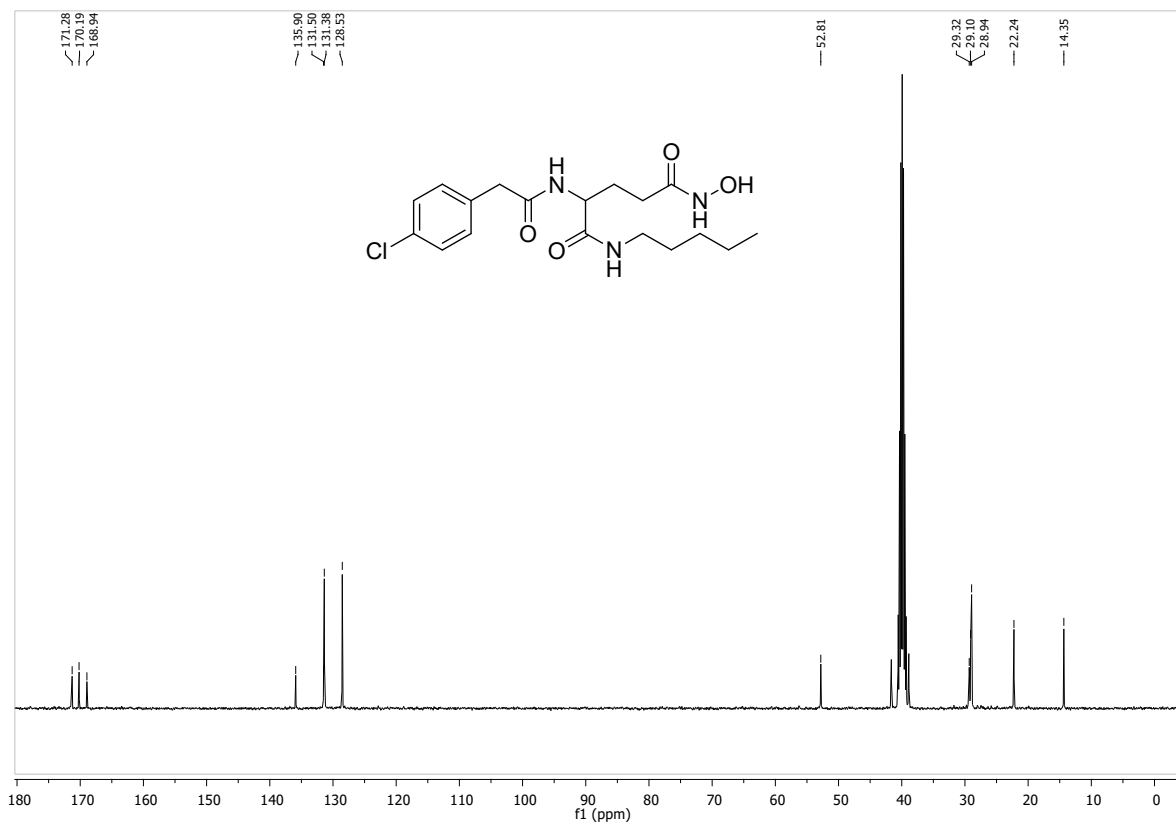

Supplementary Figure S17.  $^{13}\text{C}$  NMR of 7f

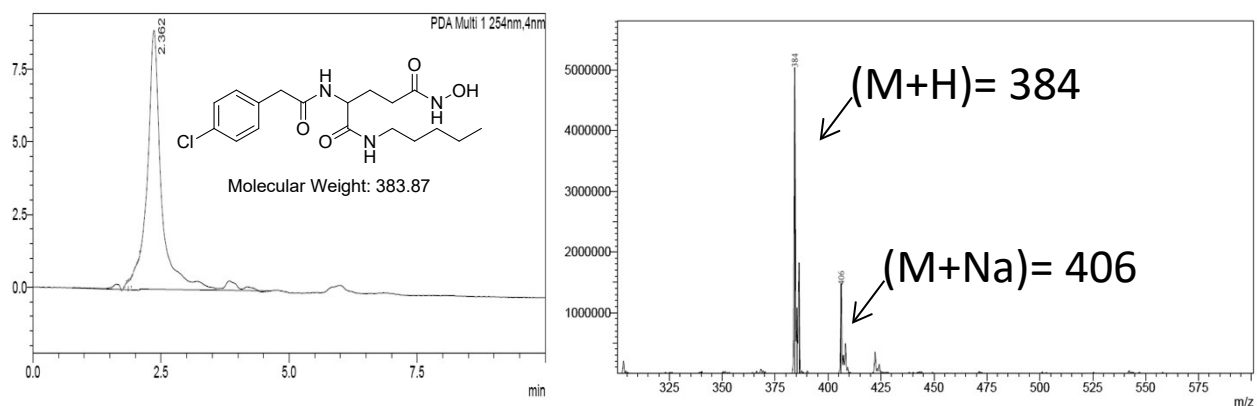

Supplementary Figure S18. LC/MS of 7f

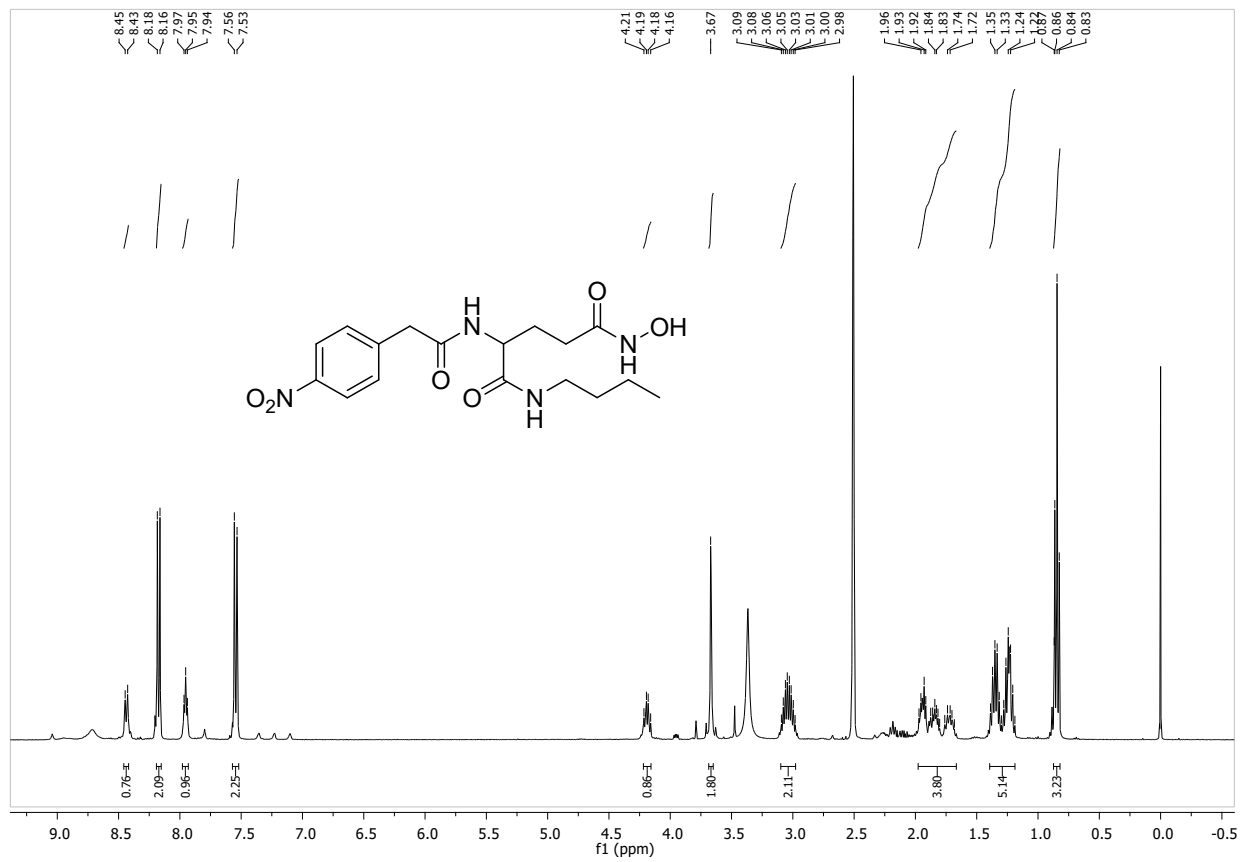

Supplementary Figure S19. <sup>1</sup>H NMR of 7g

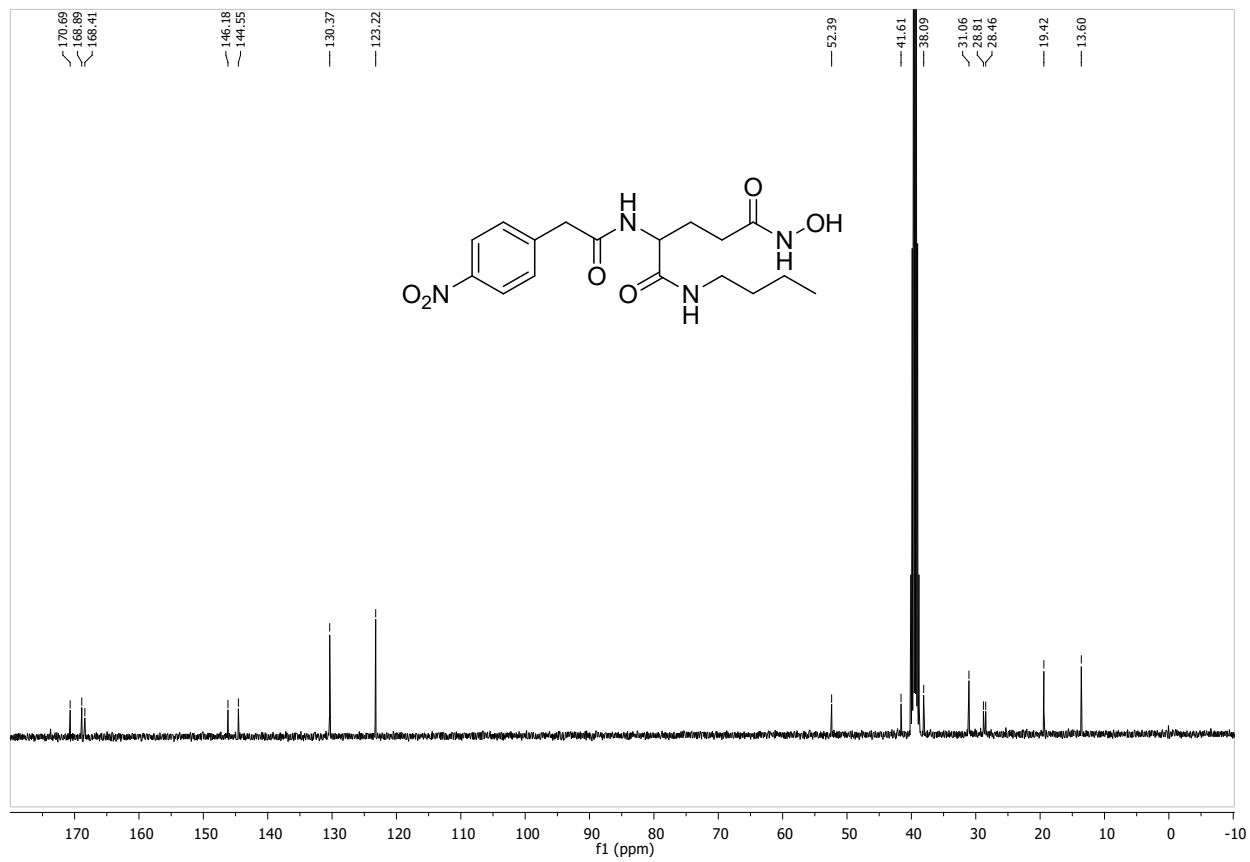

Supplementary Figure S20.  $^{13}\text{C}$  NMR of 7g

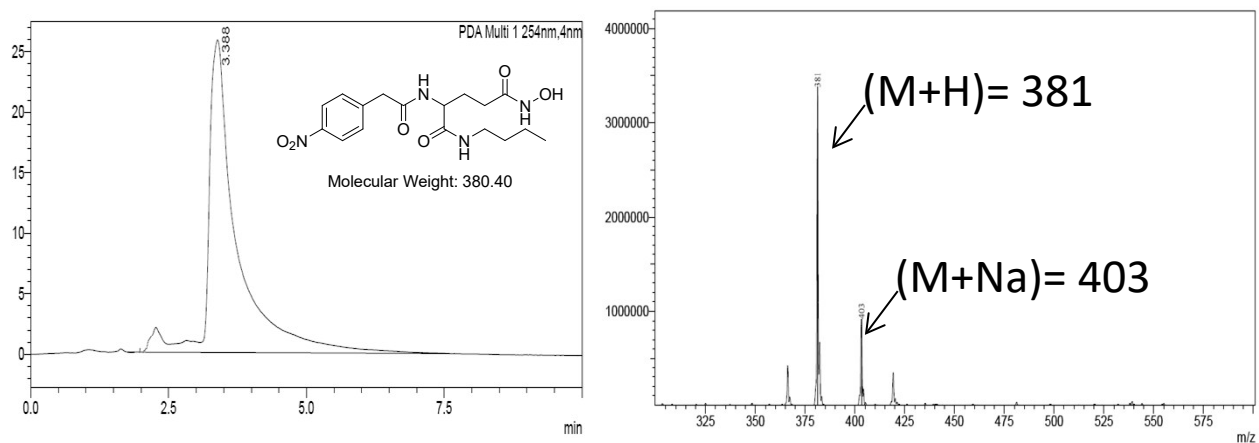

Supplementary Figure S21. LC/MS of 7g

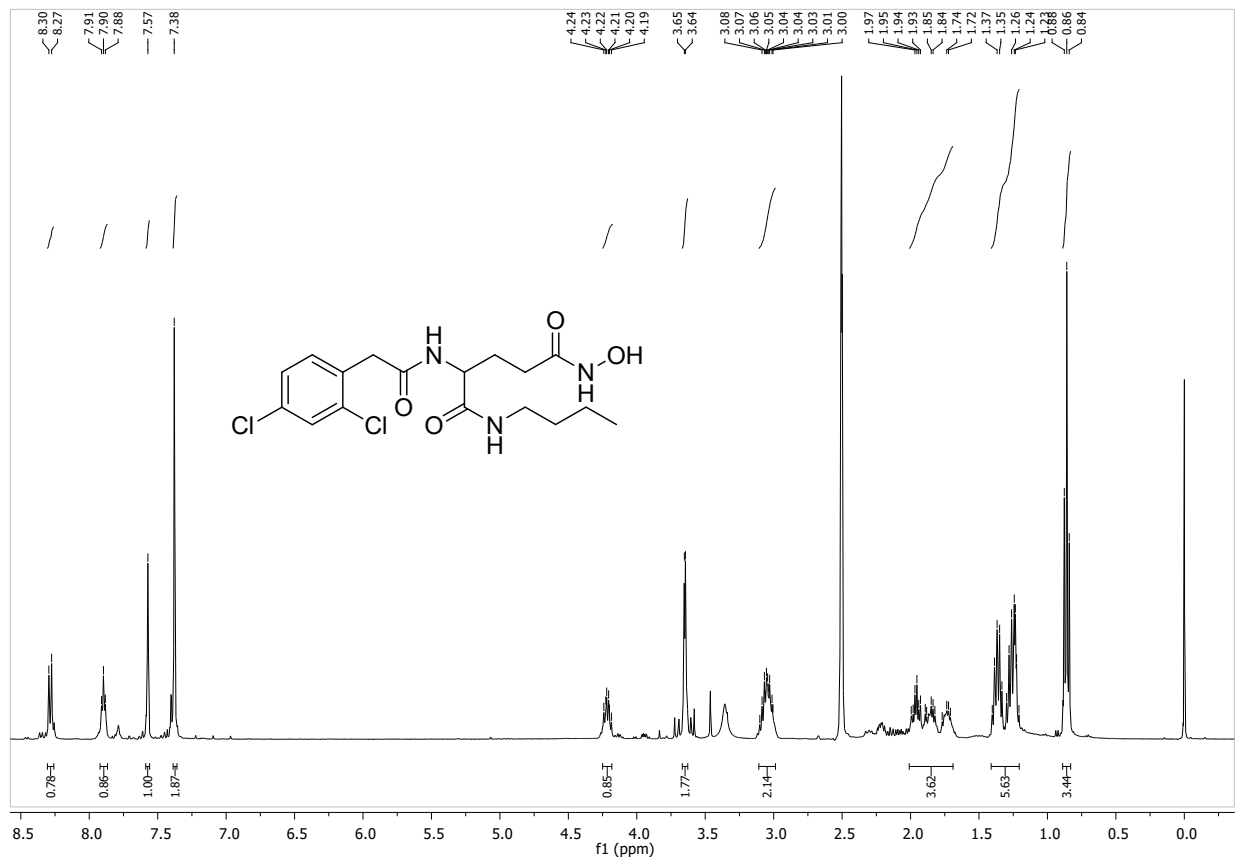

Supplementary Figure S22. <sup>1</sup>H NMR of 7h



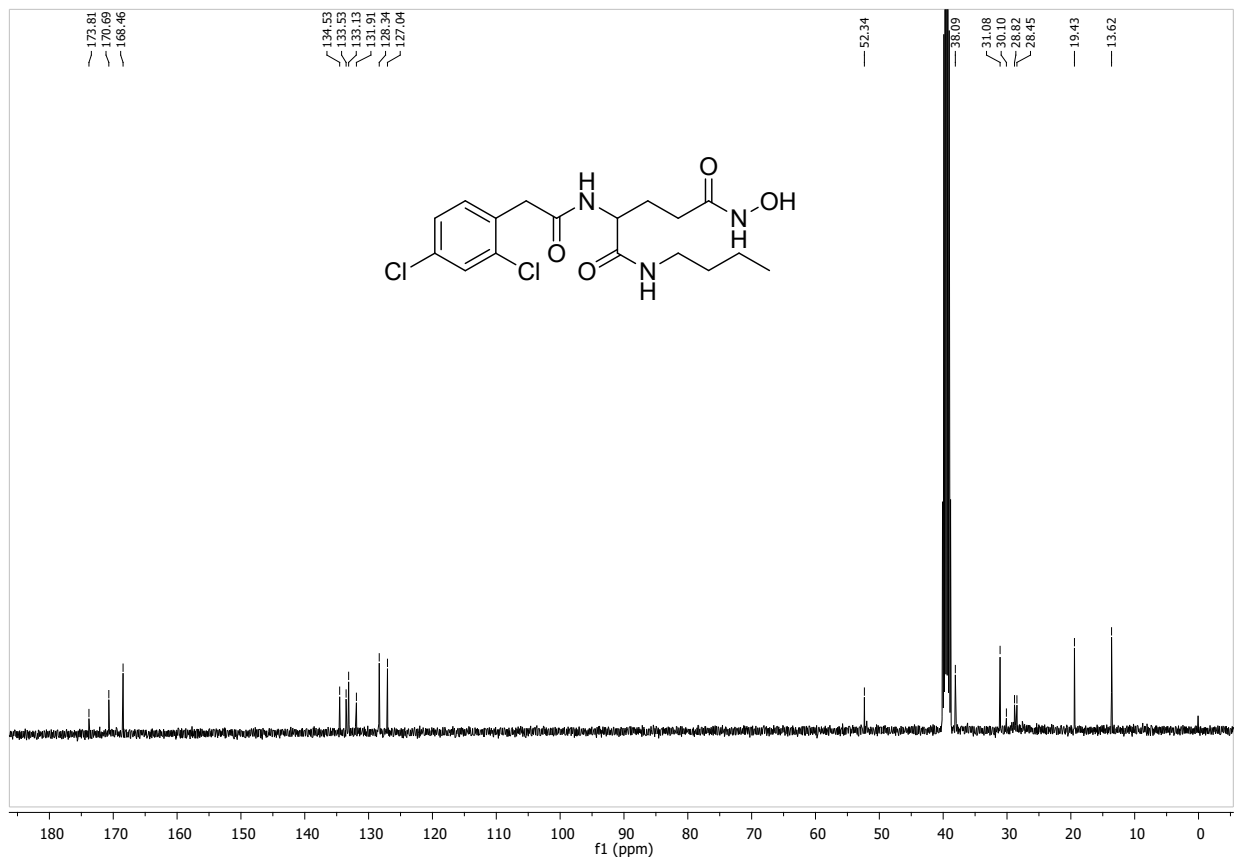

Supplementary Figure S23. <sup>13</sup>C NMR of 7h

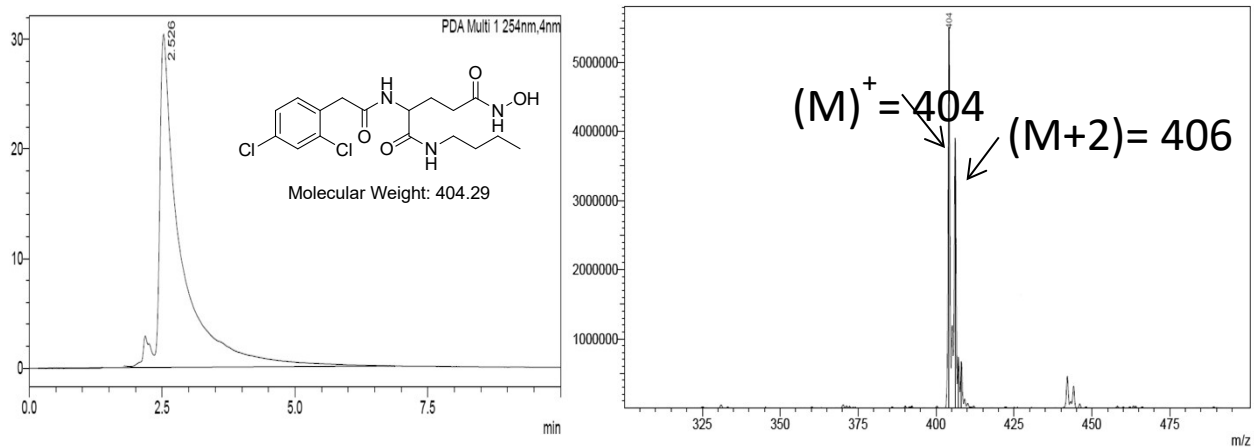

Supplementary Figure S24. LC/MS of 7h

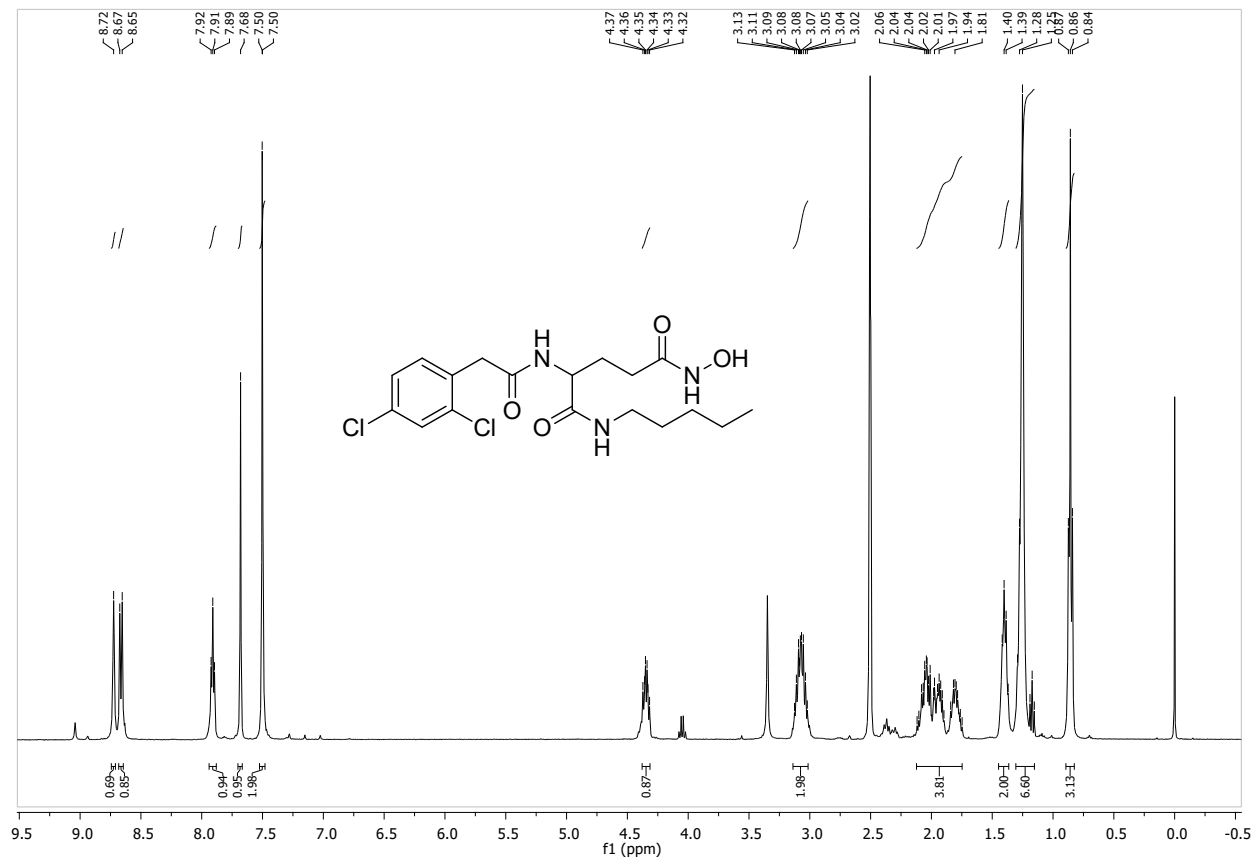

Supplementary Figure S25. <sup>1</sup>H NMR of 7i

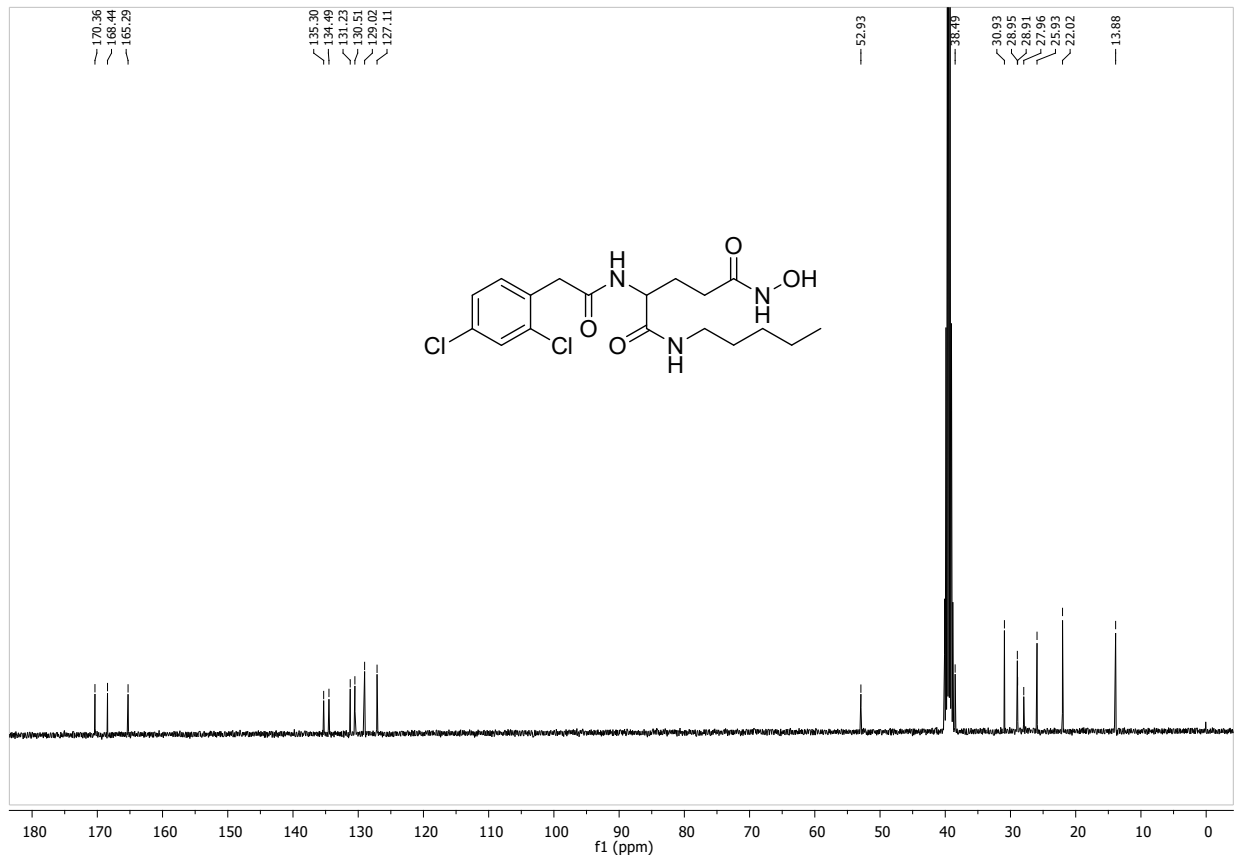

Supplementary Figure S26. <sup>13</sup>C NMR of 7i

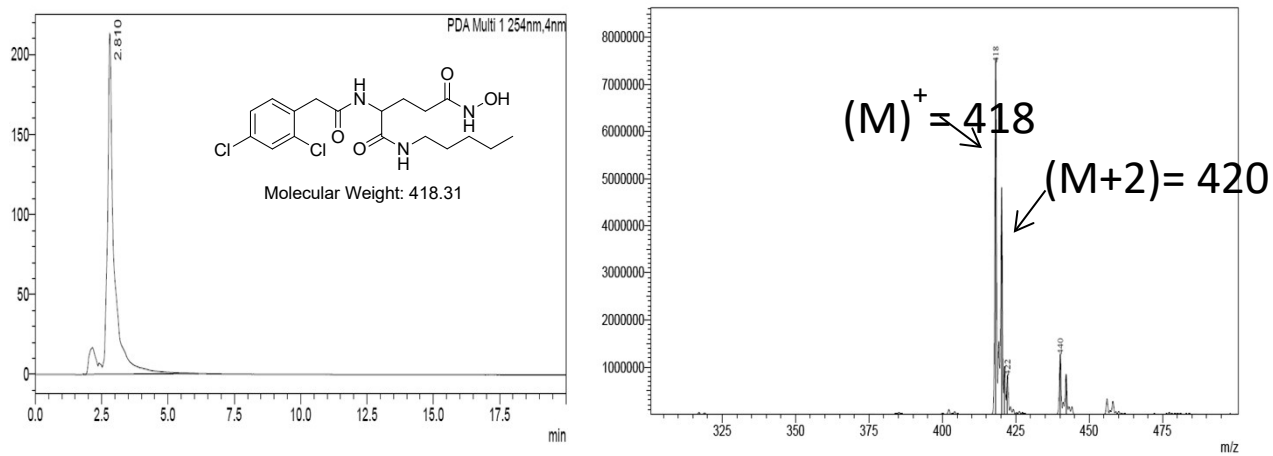

Supplementary Figure S27. LC/MS of 7i

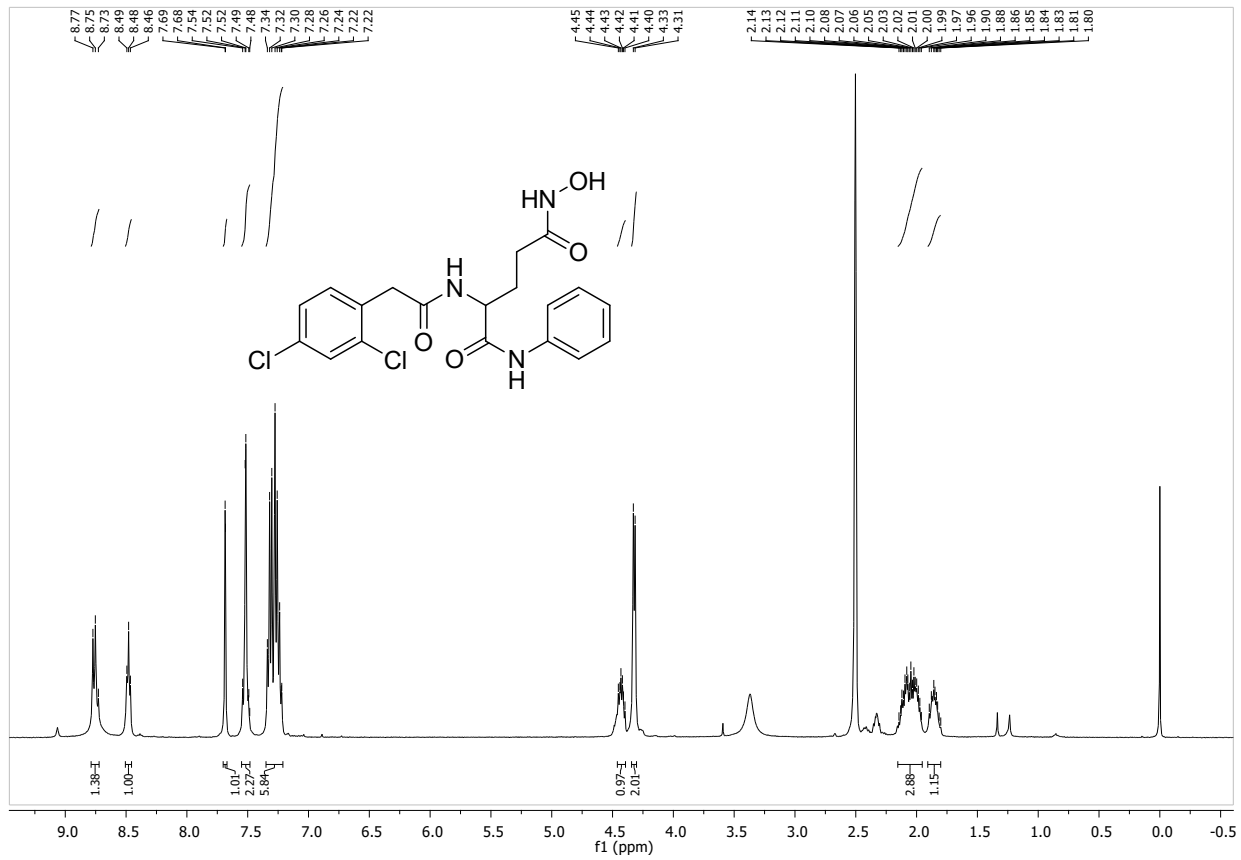

Supplementary Figure S28. <sup>1</sup>H NMR of 7j

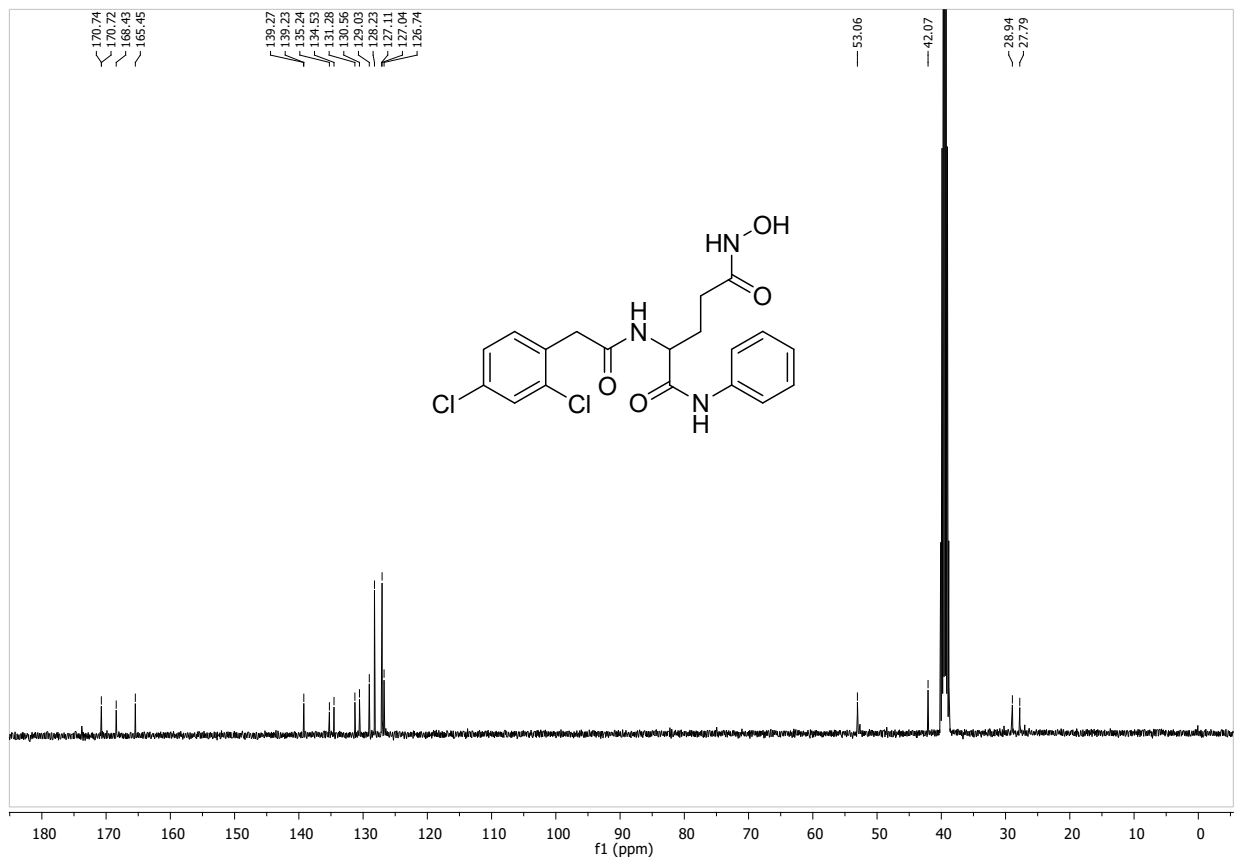

Supplementary Figure S29. <sup>13</sup>C NMR of 7j

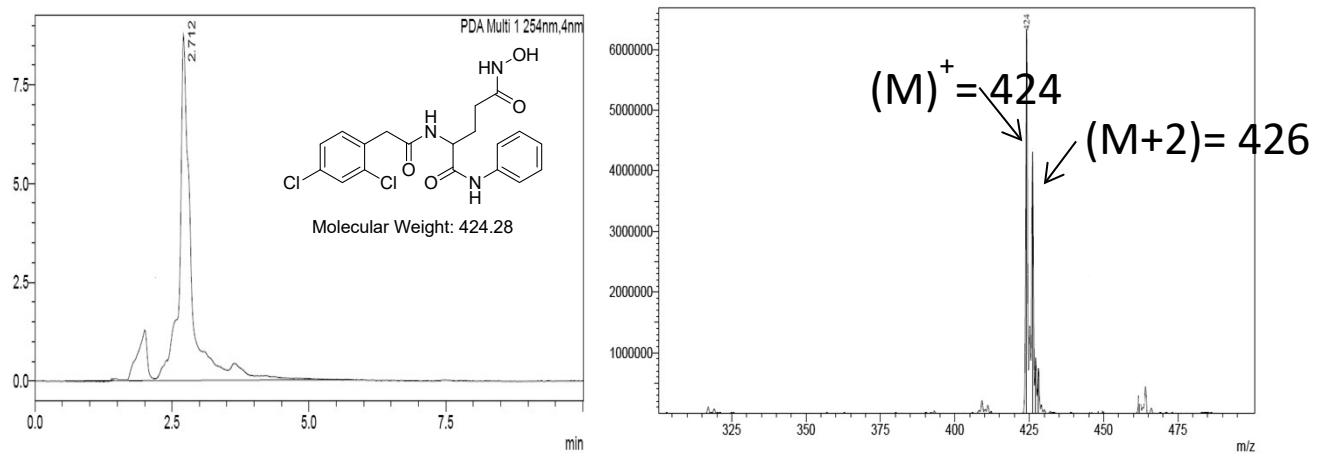

Supplementary Figure S30. LC/MS of 7j

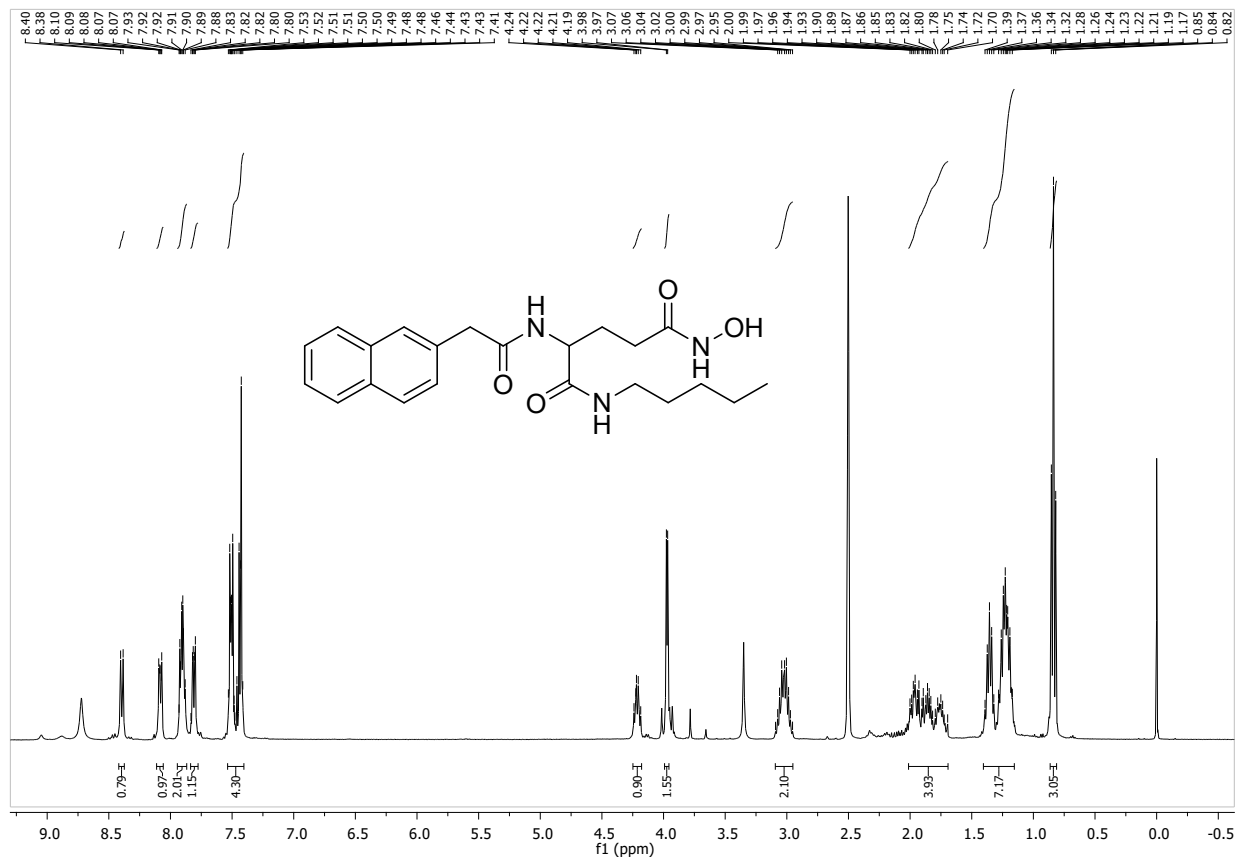

Supplementary Figure S31. <sup>1</sup>H NMR of 7k

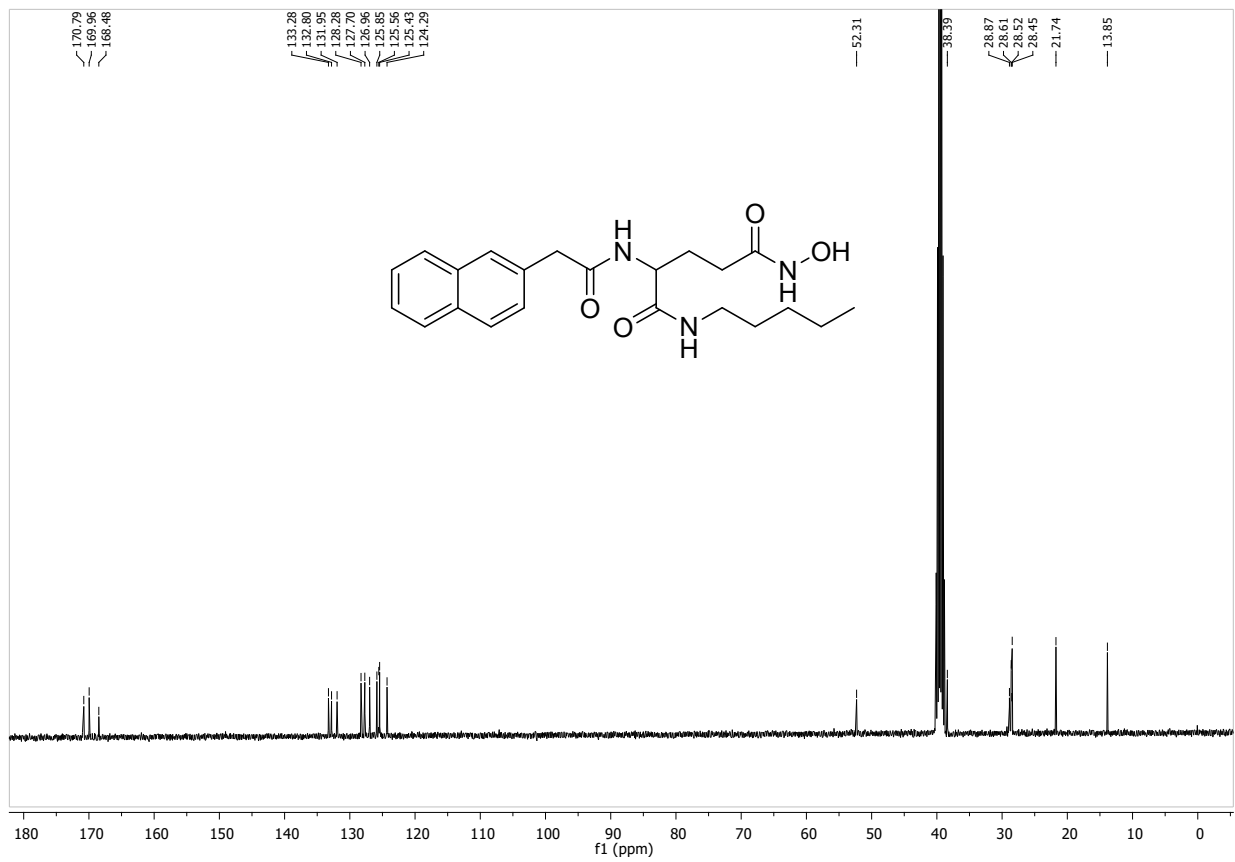

Supplementary Figure S32. <sup>13</sup>C NMR of 7k

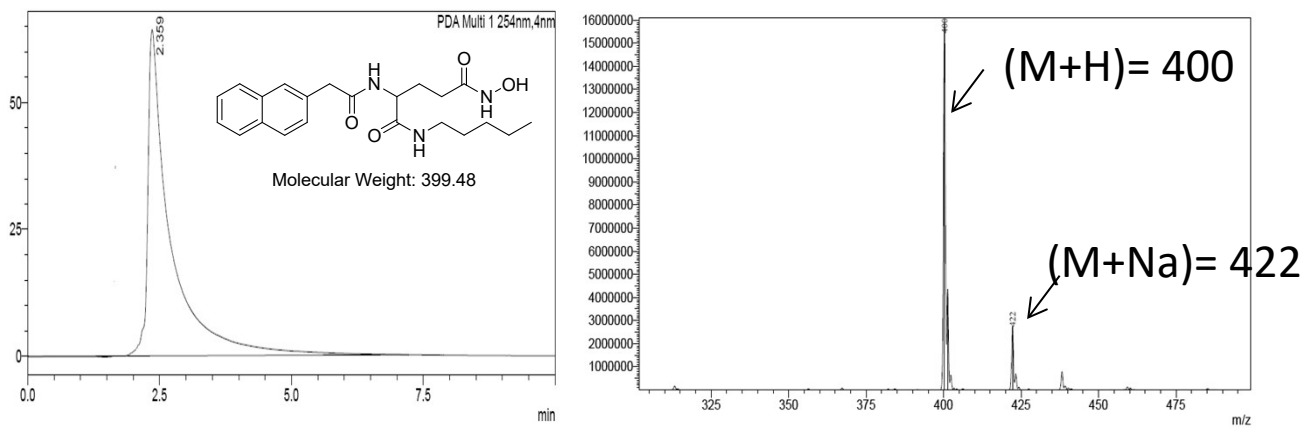

Supplementary Figure S33. LC/MS of 7k

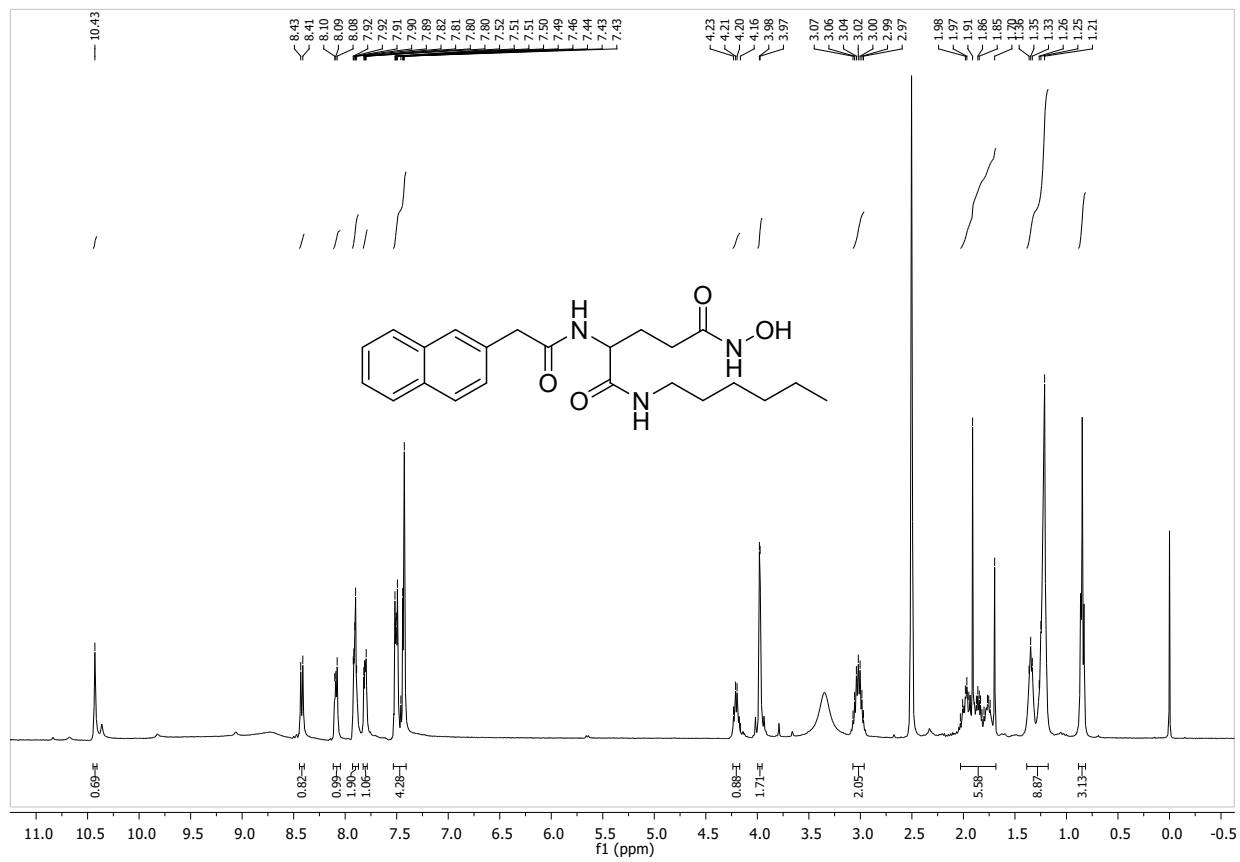

Supplementary Figure S34. <sup>1</sup>H NMR of 7l



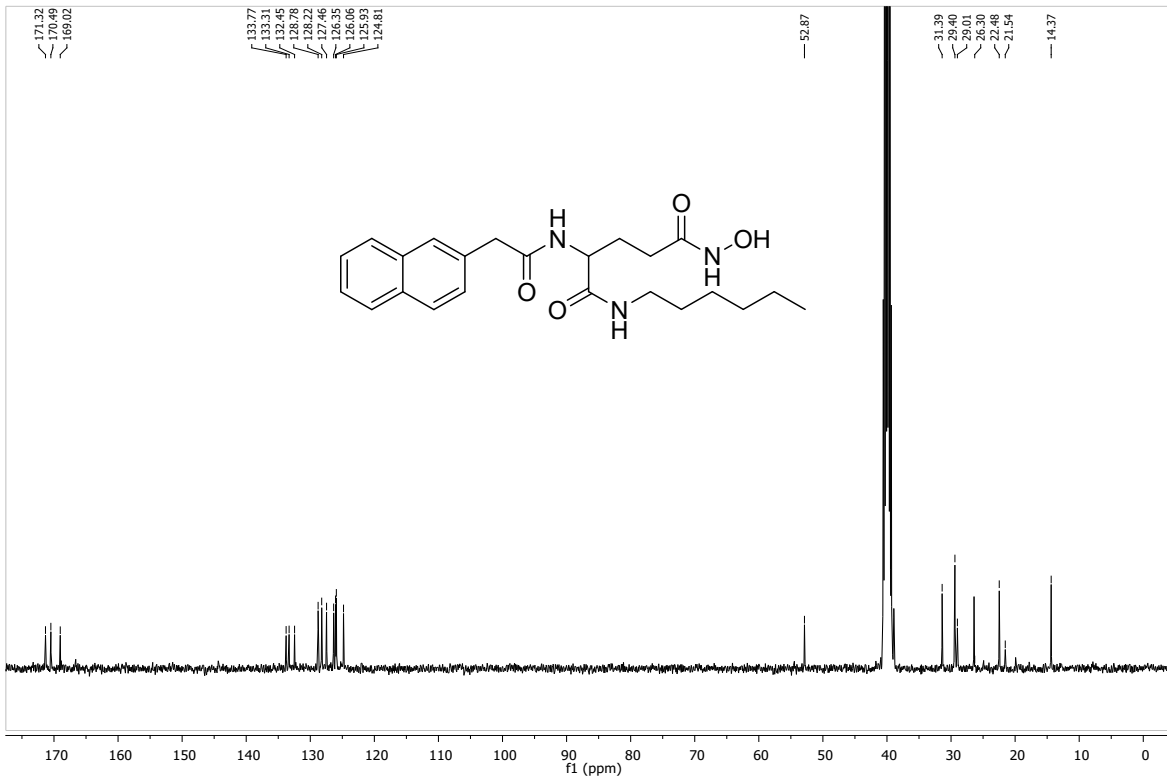

Supplementary Figure S35. <sup>13</sup>C NMR of 71

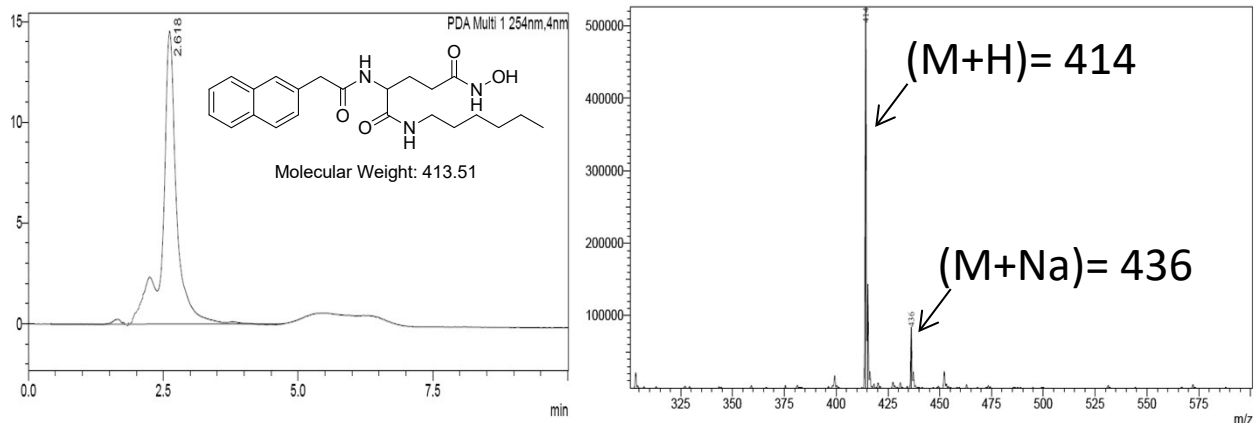

Supplementary Figure S36. LC/MS of 71

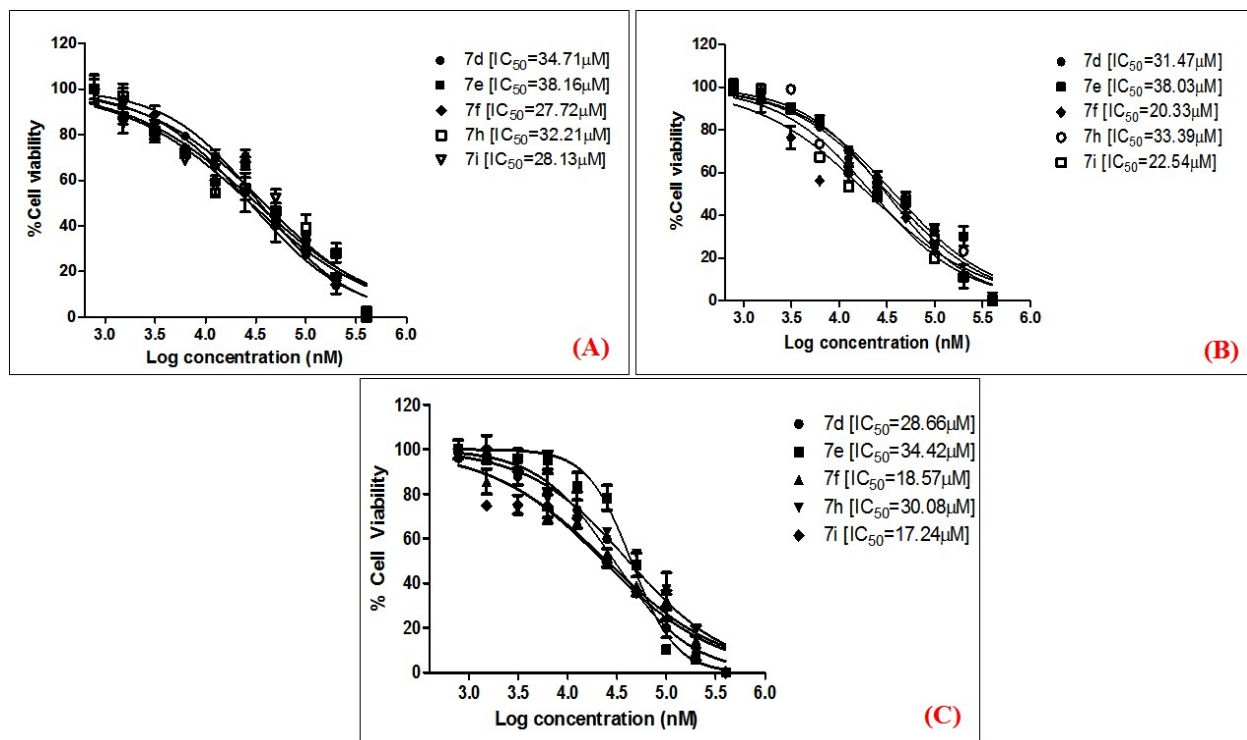

**Figure S37.** Dose response curve of **7d**, **7e**, **7f**, **7h** and **7i** on (A) B16F10, (B) A549 and (C) Jurkat E6.1 cell lines. These compounds were tested in 10 different doses and incubated for 72 hours. Cell viability was measured using MTT reagent. Data represents mean  $\pm$  SD (n=3).

**Table S1.** List of molecules considered for the modeling study

| Comp <sup>a</sup> | Smiles                                                                                          | IC <sub>50</sub> (nM) |       | SEL <sup>b</sup> | Set   |
|-------------------|-------------------------------------------------------------------------------------------------|-----------------------|-------|------------------|-------|
|                   |                                                                                                 | HDAC8                 | HDAC3 |                  |       |
| A1                | <chem>N(C(=O)c1cc(cc(c1)N=[N+]=[N-])CN=[N+]=[N-])c1ccc(c2onc(C(=O)NCCCCC(=O)NO)c2)cc1</chem>    | 651                   | 45    | 0                | Train |
| A2                | <chem>C(CCCCCC(=O)NO)NC(=O)c1noc(c1)c1ccc(cc1)N=[N+]=[N-]</chem>                                | 707                   | 73    | 0                | Test  |
| A3                | <chem>C(CCCCCC(=O)NO)C(=O)Nc1cnn(c1)Cc1cccc1</chem>                                             | 76                    | 44    | 0                | Test  |
| A4                | <chem>C(CCCCCC(=O)NO)C(=O)Nc1cnn(c1)Cc1ccc(cc1)[N+](=O)[O-]</chem>                              | 82                    | 59    | 0                | Train |
| A5                | <chem>C(CCCCCC(=O)NO)C(=O)Nc1cnn(c1)Cc1ccc(cc1)N=[N+]=[N-]</chem>                               | 28                    | 22    | 0                | Train |
| A6                | <chem>C(CCCCCC(=O)NO)C(=O)Nc1cnn(c1)Cc1ccc(cc1)NC(=O)OC(C)(C)C</chem>                           | 147                   | 191   | 1                | Train |
| A7                | <chem>C(CCCCCC(=O)NO)C(=O)Nc1cnn(c1)Cc1ccc(cc1)NC(=O)c1cc(cc(c1)N=[N+]=[N-])CN=[N+]=[N-]</chem> | 487                   | 432   | 0                | Test  |
| A8                | <chem>C(CCCCCC(=O)NO)C(=O)Nc1cnn(c1)Cc1ccc(cc1)N=[N+]=[N-])CN=[N+]=[N-]</chem>                  | 17                    | 128   | 1                | Train |
| A9                | <chem>C(=O)(c1ccc(cc1)CN(C(=O)Nc1cccc1)CCCC)NO</chem>                                           | 954                   | 6,680 | 1                | Train |
| A10               | <chem>c1cc(ccc1NC(=O)CCCCC(=O)NO)c1cnnn1Cc1ccc(c1)F</chem>                                      | 2,010                 | 16    | 0                | Test  |
| A11               | <chem>c1cc(ccc1NC(=O)CCCCC(=O)NO)c1cnnn1c1cccc1</chem>                                          | 518                   | 12    | 0                | Train |
| A12               | <chem>c1cc(ccc1NC(=O)CCCCC(=O)NO)c1cnnn1CC(O)c1ccc(c1)Br</chem>                                 | 737                   | 15    | 0                | Test  |
| A13               | <chem>c1c(cccc1NC(=O)CCCCC(=O)NO)c1cnnn1Cc1cccc1</chem>                                         | 433                   | 4.5   | 0                | Train |
| A14               | <chem>c1c(cccc1NC(=O)CCCCC(=O)NO)c1cnnn1Cc1ccc(c1)F</chem>                                      | 529                   | 6     | 0                | Test  |
| A15               | <chem>c1c(cccc1NC(=O)CCCCC(=O)NO)c1cnnn1c1cccc1</chem>                                          | 942                   | 8     | 0                | Train |
| A16               | <chem>c1c(cccc1NC(=O)CCCCC(=O)NO)c1cnnn1CC(c1ccc(c1)Br)O</chem>                                 | 406                   | 4.2   | 0                | Train |
| A17               | <chem>c1(onc(c1)COCCCC(=O)NO)c1cccc1</chem>                                                     | 3,320                 | 12.9  | 0                | Test  |
| A18               | <chem>c1(onc(c1)C(=O)NCCCC(=O)NO)c1cccc1</chem>                                                 | 3,580                 | 158   | 0                | Train |
| A19               | <chem>c1(onc(c1)C(=O)NCCCC(=O)NO)c1cccc(c1)NC(=O)OC(C)(C)C</chem>                               | 5,810                 | 84    | 0                | Train |
| A20               | <chem>c1(onc(c1)C(=O)NCCCCC(=O)NO)c1cccc(c1)N</chem>                                            | 938                   | 4     | 0                | Train |
| A21               | <chem>c1(onc(c1)C(=O)NCCCC(=O)NO)c1cccc(c1)N</chem>                                             | 3,430                 | 144   | 0                | Test  |
| A22               | <chem>c1(onc(c1)C(=O)NCCCCC(=O)NO)c1ccc(cc1)NC(=O)OC(C)(C)C</chem>                              | 6,851                 | 0     | 0                | Train |
| A23               | <chem>c1(onc(c1)C(=O)NCCCC(=O)NO)c1ccc(cc1)NC(=O)OC(C)(C)C</chem>                               | 3,650                 | 115   | 0                | Train |
| A24               | <chem>c1(onc(c1)C(=O)NCCCCC(=O)NO)c1ccc(cc1)N</chem>                                            | 3,458                 | 10    | 0                | Train |
| A25               | <chem>c1(onc(c1)C(=O)NCCCC(=O)NO)c1ccc(cc1)N</chem>                                             | 2,830                 | 66    | 0                | Train |
| A26               | <chem>c1(onc(c1)C(=O)NCCCCC(=O)NO)c1ccc(cc1)NC(=O)C</chem>                                      | 4,900                 | 18    | 0                | Train |
| A27               | <chem>c1c(ccc(c1)NC(=O)CCCCC(=O)NO)OCc1cc(cc(c1)N=[N+]=[N-])CN=[N+]=[N-]</chem>                 | 7,340                 | 1,480 | 0                | Train |
| A28               | <chem>c1cccc1NC(=O)CCCCC(=O)NO</chem>                                                           | 2,290                 | 17    | 0                | Train |
| A29               | <chem>c1cc(ccc1C(=O)/C=C/C(C)/C=C/C(=O)NO)/C)N(C)C</chem>                                       | 1,380                 | 2     | 0                | Test  |
| A30               | <chem>c1c(cc(cc1)NC(=O)CCCCC(=O)NO)c1cnnn(c1)c1ccc(</chem>                                      | 12,000                | 18    | 0                | Train |

|     |                                                            |        |        |   |       |
|-----|------------------------------------------------------------|--------|--------|---|-------|
|     | cc1)F                                                      |        |        |   |       |
| A31 | c1c(cc(cc1)NC(=O)CCCCCCC(=O)NO)c1nnn(c1)c1ccc(cc1)C(F)(F)F | 5,220  | 3      | 0 | Train |
| A32 | c1c(cc(cc1)NC(=O)CCCCCCC(=O)NO)c1nnn(c1)c1ccc(c(c1)CO)CO   | 1,320  | 3      | 0 | Train |
| A33 | c1c(cc(cc1)NC(=O)CCCCCCC(=O)NO)c1nnn(c1)C1CCC1             | 1,190  | 4      | 0 | Train |
| A34 | c1c(cc(cc1)NC(=O)CCCCCCC(=O)NO)n1nnc(c1)c1cccc1            | 4,180  | 3      | 0 | Train |
| A35 | c1c(cc(cc1)NC(=O)CCCCCCC(=O)NO)n1nnc(c1)C1CCC1             | 2,750  | 5      | 0 | Train |
| A36 | c1cc(ccc1NC(=O)CCCCCCC(=O)NO)c1cn(nn1)Cc1ccc(cc1)F         | 797    | 14     | 0 | Train |
| A37 | c1cc(ccc1NC(=O)CCCCCCC(=O)NO)c1cn(nn1)c1cccc1              | 1,970  | 8      | 0 | Train |
| A38 | c1cc(ccc1NC(=O)CCCCCCC(=O)NO)c1cn(nn1)CC(O)c1cccc(c1)Br    | 3,130  | 25     | 0 | Train |
| A39 | c1c(cccc1NC(=O)CCCCCCC(=O)NO)c1cn(nn1)Cc1cccc1             | 1,990  | 8      | 0 | Train |
| A40 | c1c(cccc1NC(=O)CCCCCCC(=O)NO)c1cn(nn1)Cc1ccc(cc1)F         | 552    | 4      | 0 | Train |
| A41 | c1c(cccc1NC(=O)CCCCCCC(=O)NO)c1cn(nn1)c1cccc1              | 2,780  | 7      | 0 | Test  |
| A42 | c1c(cccc1NC(=O)CCCCCCC(=O)NO)c1cn(nn1)CC(O)c1cccc(c1)Br    | 440    | 3      | 0 | Test  |
| A43 | c1cc(ccc1NC(=O)CCCCCCC(=O)NO)c1cnm1Cc1cccc1                | 790    | 9.7    | 0 | Train |
| A44 | C(=O)(CCCCCC[NH2+]Cc1cccc1)NO                              | 1,800  | 430    | 0 | Train |
| A45 | C(=O)(CCCC[NH2+]Cc1cccc1)NO                                | 10,000 | 22,000 | 1 | Train |
| A46 | C(=O)(CCCCCC[NH+](Cc1cccc1)Cc1cccc1)NO                     | 4,000  | 1,100  | 0 | Train |
| A47 | C(=O)(CCCC[NH+](Cc1cccc1)Cc1cccc1)NO                       | 1,900  | 1,400  | 0 | Train |
| A48 | C(=O)(CC[NH+](Cc1cccc1)Cc1cccc1)NO                         | 1,400  | 52,000 | 1 | Train |
| A49 | C(=O)(CCCCC[NH+]1C2c(CC1)cccc2)NO                          | 1,900  | 97     | 0 | Train |
| A50 | C(=O)(CC[NH+]1C2c(CC1)cccc2)NO                             | 19,000 | 98,000 | 1 | Test  |
| A51 | C(=O)(CCCC[NH+]1C(c2c(CC1)cccc2)c1cccc1)NO                 | 44     | 810    | 1 | Train |
| A52 | C(=O)(CC[NH+]1C(c2c(CC1)cccc2)c1cccc1)NO                   | 950    | 10,000 | 1 | Train |
| A53 | C(C[NH+]1C(c2c(CC1)cccc2)c1cccc(c1)OC)C(=O)NO              | 110    | 34,000 | 1 | Train |
| A54 | C(=O)(CC[NH+]1C(c2c(CC1)cccc2)c1ccc(cc1)C(F)(F)F)NO        | 190    | 27,000 | 1 | Test  |
| A55 | C(=O)(CC[NH+]1C(c2c(CC1)cccc2)C1CCCC1)NO                   | 6,700  | 75,000 | 1 | Test  |
| A56 | C(=O)(CC[NH+]1C(c2c(CC1)cccc2)c1ccc(cc1)C(C)(C)C)NO        | 480    | 29,000 | 1 | Train |
| A57 | C(=O)(CC[NH+]1C(c2c(CC1)cccc2)c1cccc2cccc12)NO             | 390    | 3,400  | 1 | Train |
| A58 | C(=O)(CC[NH+]1C(c2c(CC1)cccc2)c1ccc(cc1)c1cccc1)NO         | 55     | 38,000 | 1 | Train |
| A59 | c1c(cc2c(c1)ccn2Cc1ccc(cc1)OC)C(=O)N[O-]                   | 6.6    | 7,100  | 1 | Train |

<sup>a</sup>Compound number; <sup>b</sup>Range of HDAC8 selectivity

**Table S2.** Correlation matrix among biological activity and selected parameters of Eq. (1)

|                                | <i>nAtomL</i><br><i>AC</i> | <i>PubchemF</i><br><i>P357</i> | <i>PubchemF</i><br><i>P300</i> | <i>Pubchem</i><br><i>FP2</i> | <i>GATS</i><br><i>6v</i> | <i>PubchemF</i><br><i>P528</i> | <i>GATS</i><br><i>3s</i> | <i>PubchemF</i><br><i>P713</i> | <i>BA(8/3)</i> |
|--------------------------------|----------------------------|--------------------------------|--------------------------------|------------------------------|--------------------------|--------------------------------|--------------------------|--------------------------------|----------------|
| <i>nAtomLAC</i>                | 1                          | 0.39                           | 0.73                           | 0.25                         | -0.46                    | -0.56                          | 0.62                     | -0.6                           | -0.77          |
| <i>PubchemF</i><br><i>P357</i> |                            | 1                              | 0.44                           | -0.18                        | -0.43                    | -0.33                          | 0.58                     | -0.22                          | -0.67          |
| <i>PubchemF</i><br><i>P300</i> |                            |                                | 1                              | 0                            | -0.27                    | -0.83                          | 0.51                     | -0.31                          | -0.42          |
| <i>PubchemF</i><br><i>P2</i>   |                            |                                |                                | 1                            | 0.17                     | 0.2                            | 0.24                     | -0.31                          | -0.37          |
| <i>GATS6v</i>                  |                            |                                |                                |                              | 1                        | 0.07                           | -0.32                    | 0.4                            | 0.51           |
| <i>PubchemF</i><br><i>P528</i> |                            |                                |                                |                              |                          | 1                              | -0.45                    | 0.02                           | 0.3            |
| <i>GATS3s</i>                  |                            |                                |                                |                              |                          |                                | 1                        | -0.4                           | -0.65          |
| <i>PubchemF</i><br><i>P713</i> |                            |                                |                                |                              |                          |                                |                          | 1                              | 0.56           |
| <i>BA(8/3)</i>                 |                            |                                |                                |                              |                          |                                |                          |                                | 1              |

**Table S3.** *t*-Value and *p*-Value for Eq. (1)

|                     | <i>t</i> (36) | <i>p</i> -level |
|---------------------|---------------|-----------------|
| <b>Intercept</b>    | -2.274        | 0.029           |
| <i>nAtomLAC</i>     | -6.693        | 0.000           |
| <i>PubchemFP357</i> | -13.182       | 0.000           |
| <i>PubchemFP300</i> | 8.014         | 0.000           |
| <i>PubchemFP2</i>   | -9.345        | 0.000           |
| <i>GATS6v</i>       | 4.422         | 0.000           |
| <i>PubchemFP528</i> | 5.721         | 0.000           |
| <i>GATS3s</i>       | 3.187         | 0.003           |
| <i>PubchemFP713</i> | 2.549         | 0.015           |

**Table S4.** *R*<sup>2</sup> and *Q*<sup>2</sup> values after several Y-randomization tests for Eq. (1)

| MODEL TYPE      | <i>R</i>     | <i>R</i> <sup>2</sup> | <i>Q</i> <sup>2</sup> <sub>(<i>L</i><sub>00</sub>)</sub> |
|-----------------|--------------|-----------------------|----------------------------------------------------------|
| <b>Original</b> | <b>0.978</b> | <b>0.956</b>          | <b>0.932</b>                                             |
| Random 1        | 0.619        | 0.383                 | -0.097                                                   |
| Random 2        | 0.616        | 0.380                 | -0.145                                                   |
| Random 3        | 0.477        | 0.228                 | -0.676                                                   |
| Random 4        | 0.490        | 0.240                 | -0.143                                                   |
| Random 5        | 0.492        | 0.242                 | -0.209                                                   |
| Random 6        | 0.451        | 0.203                 | -0.095                                                   |
| Random 7        | 0.329        | 0.108                 | -0.470                                                   |
| Random 8        | 0.419        | 0.176                 | -0.900                                                   |
| Random 9        | 0.520        | 0.271                 | -0.283                                                   |
| Random 10       | 0.522        | 0.273                 | -0.293                                                   |

|                  |       |       |        |
|------------------|-------|-------|--------|
| <b>Random 11</b> | 0.486 | 0.236 | -0.351 |
| <b>Random 12</b> | 0.307 | 0.094 | -0.446 |
| <b>Random 13</b> | 0.298 | 0.089 | -0.912 |
| <b>Random 14</b> | 0.379 | 0.144 | -0.311 |
| <b>Random 15</b> | 0.431 | 0.186 | -0.660 |
| <b>Random 16</b> | 0.493 | 0.243 | 0.002  |
| <b>Random 17</b> | 0.341 | 0.117 | -0.322 |
| <b>Random 18</b> | 0.441 | 0.194 | -0.507 |
| <b>Random 19</b> | 0.432 | 0.187 | -0.327 |
| <b>Random 20</b> | 0.387 | 0.150 | -0.354 |
| <b>Random 21</b> | 0.454 | 0.206 | -0.538 |
| <b>Random 22</b> | 0.416 | 0.173 | -0.392 |
| <b>Random 23</b> | 0.362 | 0.131 | -0.801 |
| <b>Random 24</b> | 0.365 | 0.133 | -0.301 |
| <b>Random 25</b> | 0.295 | 0.087 | -0.351 |
| <b>Random 26</b> | 0.353 | 0.124 | -0.335 |
| <b>Random 27</b> | 0.262 | 0.069 | -0.360 |
| <b>Random 28</b> | 0.425 | 0.181 | -0.287 |
| <b>Random 29</b> | 0.415 | 0.173 | -0.252 |
| <b>Random 30</b> | 0.345 | 0.119 | -0.399 |
| <b>Random 31</b> | 0.292 | 0.086 | -0.674 |
| <b>Random 32</b> | 0.423 | 0.179 | -0.222 |
| <b>Random 33</b> | 0.288 | 0.083 | -0.437 |
| <b>Random 34</b> | 0.352 | 0.124 | -0.232 |
| <b>Random 35</b> | 0.266 | 0.071 | -0.759 |
| <b>Random 36</b> | 0.453 | 0.205 | -0.264 |
| <b>Random 37</b> | 0.244 | 0.059 | -1.515 |
| <b>Random 38</b> | 0.583 | 0.340 | -0.046 |
| <b>Random 39</b> | 0.396 | 0.157 | -0.277 |
| <b>Random 40</b> | 0.489 | 0.239 | -0.175 |
| <b>Random 41</b> | 0.454 | 0.206 | -0.542 |
| <b>Random 42</b> | 0.537 | 0.288 | -0.152 |
| <b>Random 43</b> | 0.415 | 0.172 | -0.427 |
| <b>Random 44</b> | 0.428 | 0.183 | -0.638 |
| <b>Random 45</b> | 0.501 | 0.251 | -1.405 |
| <b>Random 46</b> | 0.387 | 0.150 | -0.398 |
| <b>Random 47</b> | 0.454 | 0.206 | -0.150 |
| <b>Random 48</b> | 0.354 | 0.126 | -0.409 |
| <b>Random 49</b> | 0.425 | 0.181 | -0.448 |
| <b>Random 50</b> | 0.399 | 0.159 | -0.508 |

**Table S5. The descriptors and predicted activity of designed inhibitors**

| <b>Cpd<sup>a</sup></b> | <b>nAtomLA<br/>C</b> | <b>PubchemFP3<br/>57</b> | <b>PubchemFP3<br/>00</b> | <b>PubchemF<br/>P2</b> | <b>GATS6<br/>v</b> | <b>PubchemFP5<br/>28</b> | <b>GATS3<br/>s</b> | <b>PubchemFP7<br/>I3</b> | <b>ML<br/>R</b> | <b>SV<br/>M</b> |
|------------------------|----------------------|--------------------------|--------------------------|------------------------|--------------------|--------------------------|--------------------|--------------------------|-----------------|-----------------|
| <b>7a</b>              | 5                    | 0                        | 0                        | 1                      | 0.846              | 1                        | 0.909              | 0                        | SEL             | SEL             |
| <b>7b</b>              | 5                    | 0                        | 0                        | 1                      | 0.977              | 1                        | 0.931              | 0                        | SEL             | SEL             |
| <b>7c</b>              | 5                    | 0                        | 0                        | 1                      | 0.882              | 1                        | 0.911              | 0                        | SEL             | SEL             |
| <b>7d</b>              | 6                    | 0                        | 0                        | 1                      | 0.898              | 1                        | 0.893              | 0                        | SEL             | SEL             |
| <b>7e</b>              | 5                    | 0                        | 0                        | 1                      | 0.937              | 1                        | 0.934              | 0                        | SEL             | SEL             |
| <b>7f</b>              | 5                    | 0                        | 0                        | 1                      | 0.887              | 1                        | 0.912              | 0                        | SEL             | SEL             |
| <b>7g</b>              | 5                    | 0                        | 0                        | 1                      | 0.964              | 1                        | 0.778              | 0                        | SEL             | SEL             |
| <b>7h</b>              | 5                    | 0                        | 0                        | 1                      | 0.925              | 1                        | 0.932              | 0                        | SEL             | SEL             |
| <b>7i</b>              | 5                    | 0                        | 0                        | 1                      | 0.875              | 1                        | 0.911              | 0                        | SEL             | SEL             |
| <b>7j</b>              | 5                    | 0                        | 0                        | 1                      | 0.952              | 1                        | 0.994              | 0                        | SEL             | SEL             |
| <b>7k</b>              | 5                    | 0                        | 0                        | 1                      | 0.895              | 1                        | 0.896              | 1                        | NS              | SEL             |
| <b>7l</b>              | 6                    | 0                        | 0                        | 1                      | 0.909              | 1                        | 0.880              | 1                        | NS              | SEL             |

<sup>a</sup>Compound number; SEL, HDAC8 selective; NS, non-selective
